# Supplementary material for: The Evolving Faces of the SARS-CoV-2 Genome
Source: MDPI journal article supplement (doi:10.3390/v13091764), 2021-09-03

A

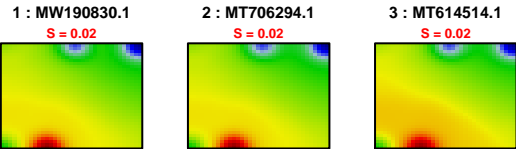

A.1

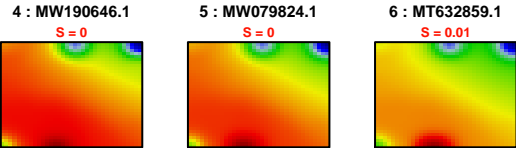

B

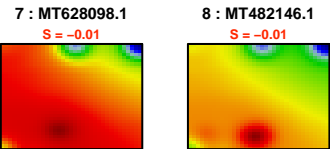

B.1

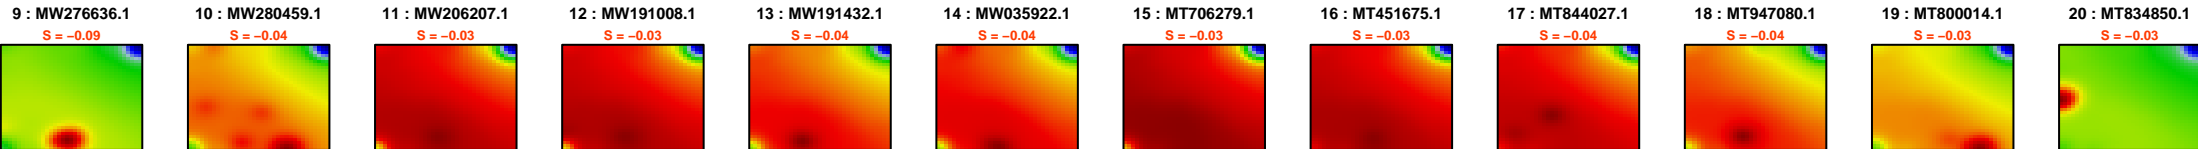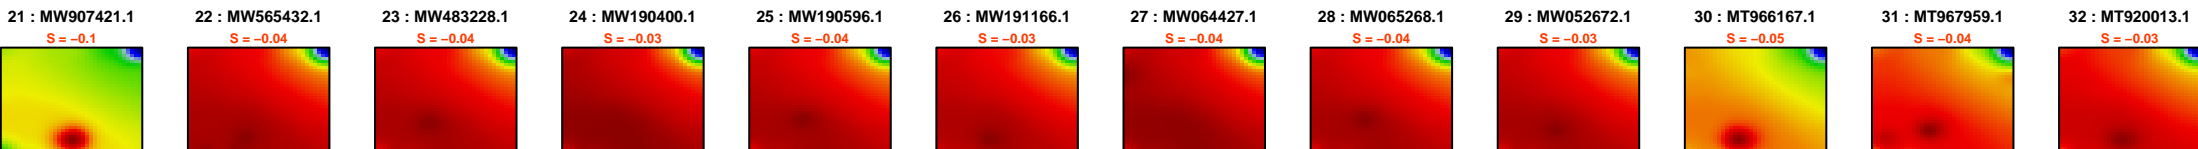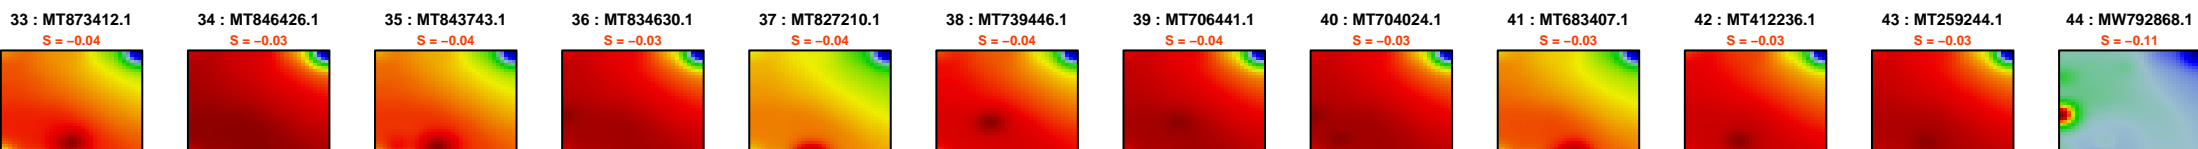

B.1.1

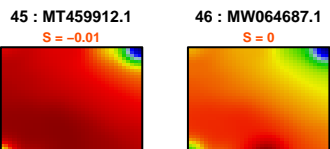

# B.1.1.136

47 : MT972137.1

S = 0

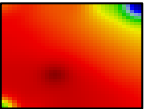

# B.1.1.169

48 : MW279423.1

S = 0

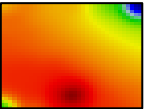

# B.1.1.186

49 : MW719920.1

S = 0

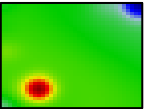

# B.1.1.205

50 : MW306370.1

S = 0

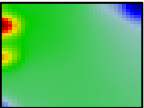

# B.1.1.222

51 : MW681161.1

S = 0

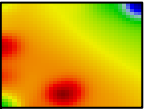

52 : MW653612.1

S = 0

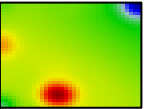

# B.1.1.228

53 : MW645720.1

S = -0.01

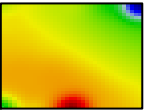

54 : MW206329.1

S = 0.02

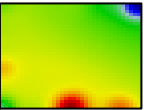

# B.1.1.231

55 : MW521681.1

S = 0

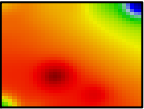

# B.1.1.244

56 : MW206601.1

S = 0

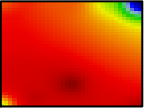

# B.1.1.291

57 : MT831212.1

S = -0.01

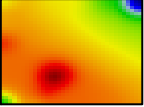

58 : MT831708.1

S = -0.01

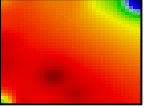

# B.1.1.316

59 : MW864396.1

S = 0.12

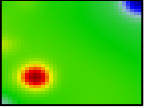

60 : MW666340.1

S = 0.09

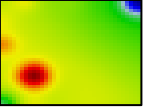

# B.1.1.416

61 : MW738279.1

S = 0

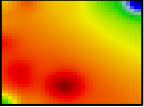

# B.1.1.432

62 : MW763480.1

S = 0.01

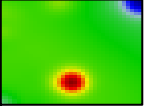

63 : MW521794.1

S = -0.02

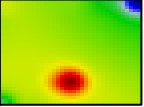

# B.1.1.434

64 : MW668844.1

S = 0

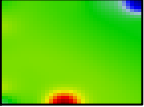

# B.1.1.519

65 : MW903995.1

S = 0.25

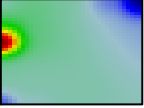

66 : MW849227.1

S = 0.41

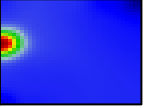

67 : MW849880.1

S = 0.35

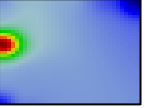

68 : MW681413.1

S = 0.28

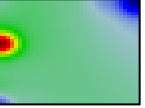

69 : MW667310.1

S = 0.3

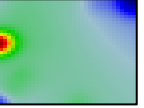

B.1.1.7\_VOC

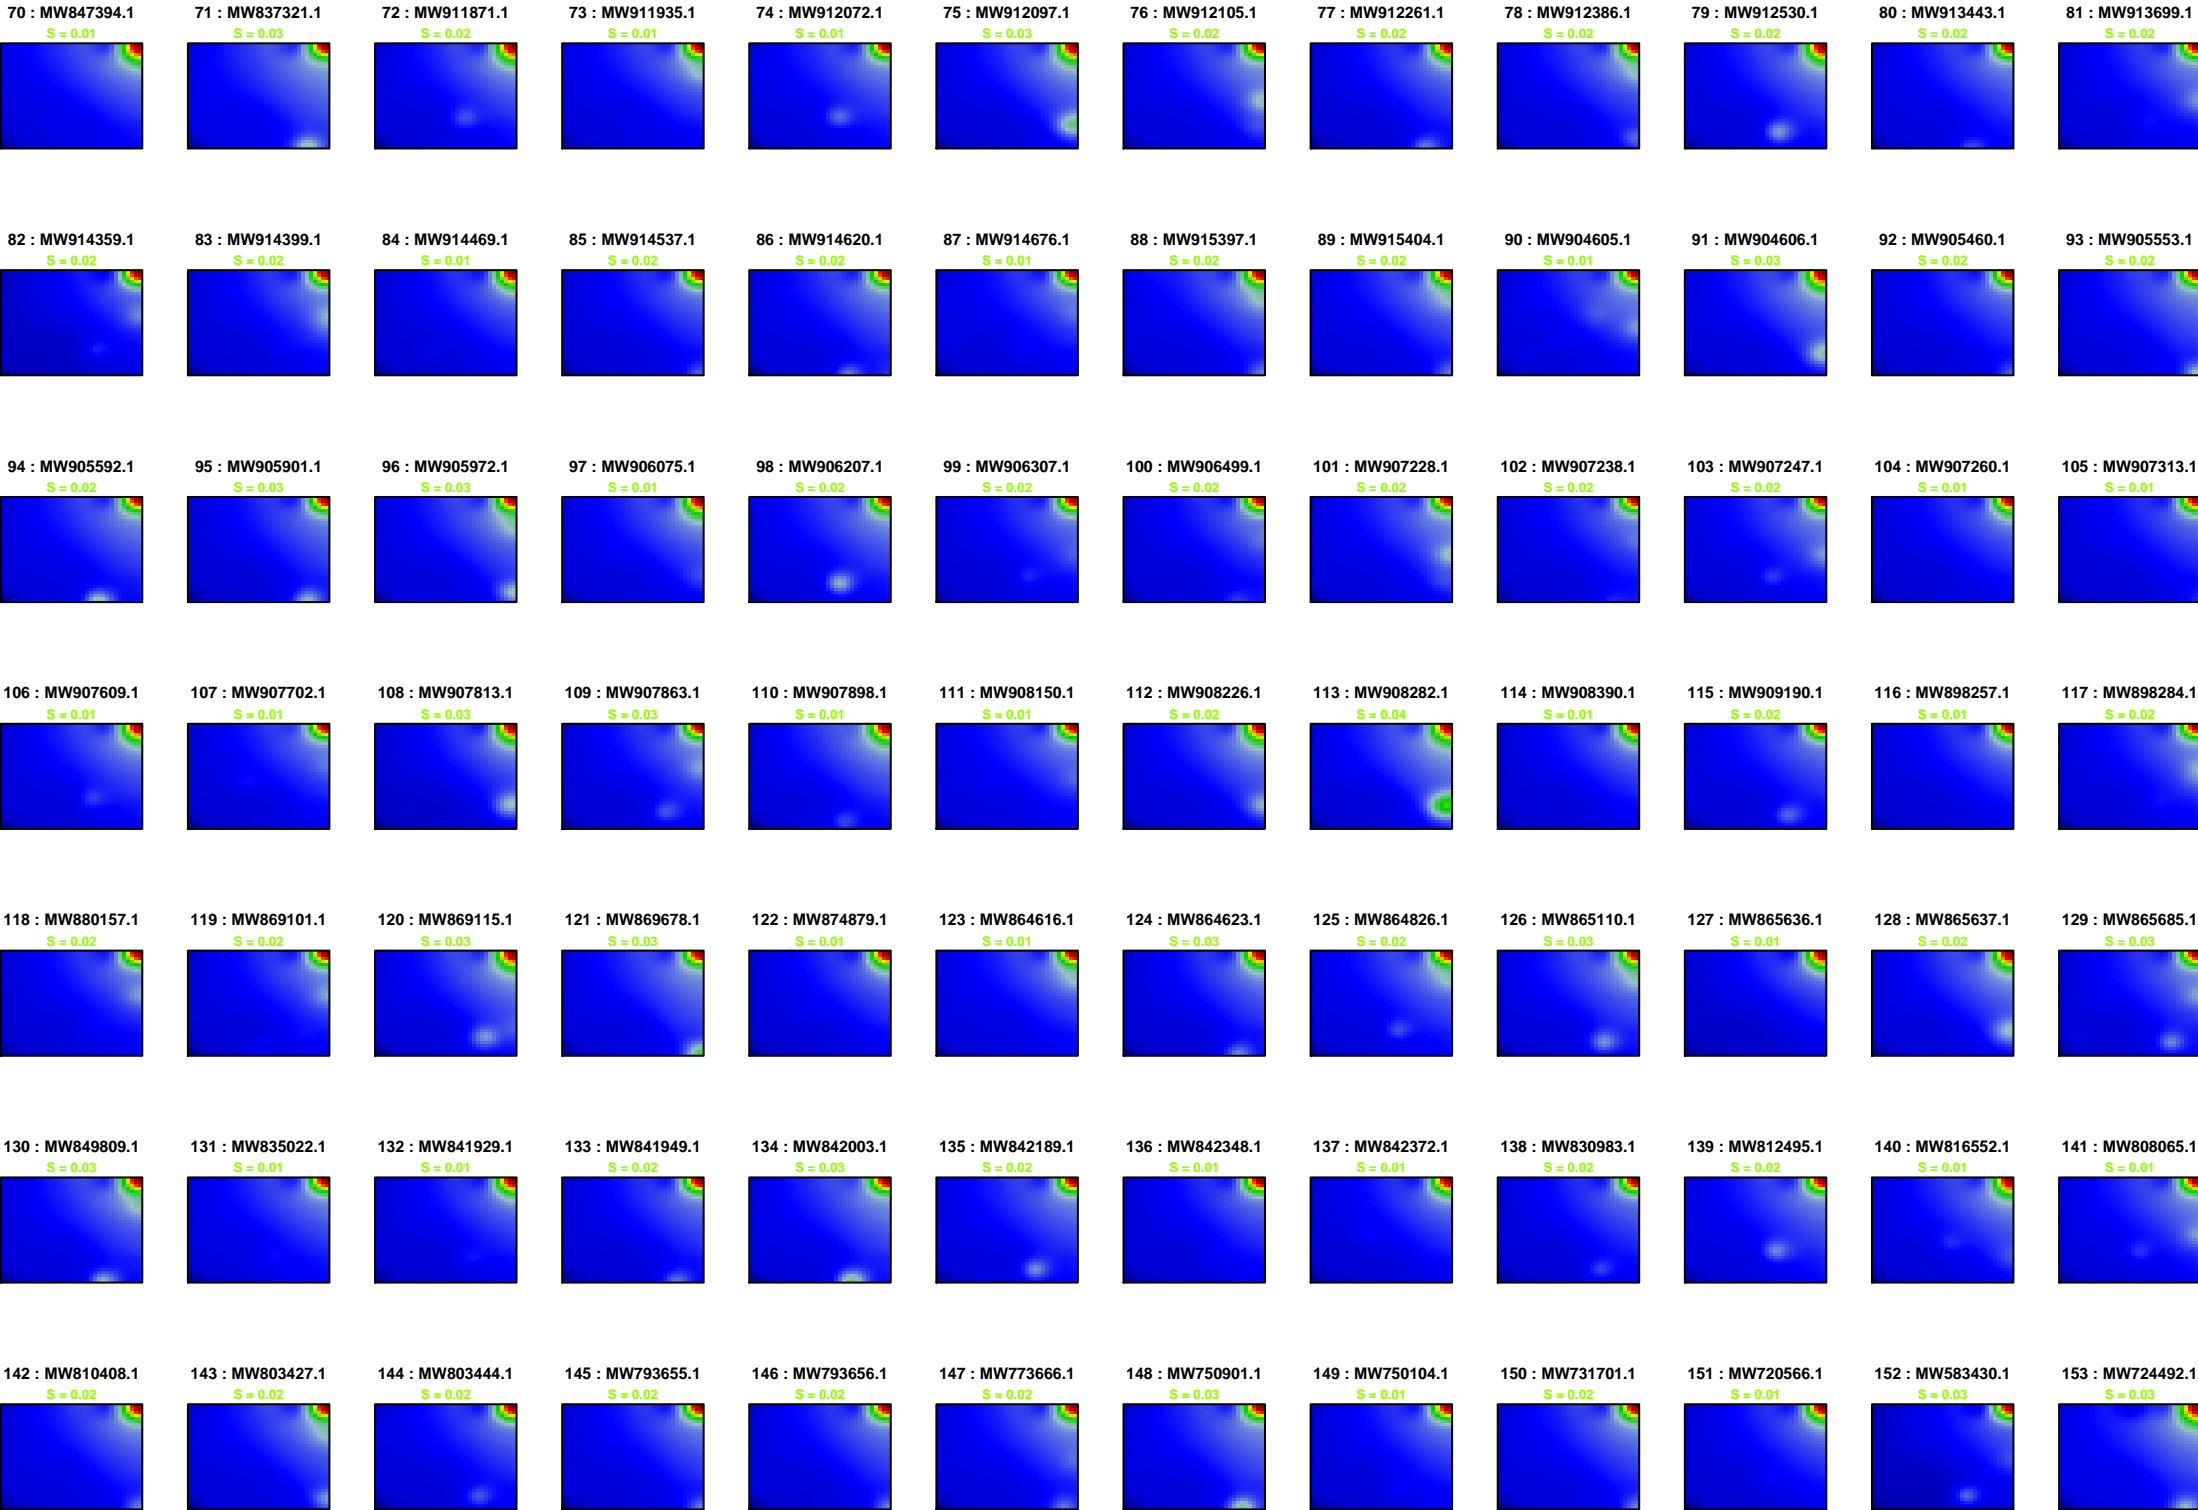



# B.1.110

154 : MW364999.1

S = 0

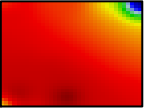

# B.1.110.3

155 : MW825510.1

S = 0.17

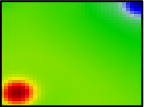

156 : MW813533.1

S = 0.16

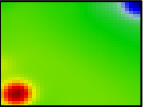

157 : MW772211.1

S = 0.18

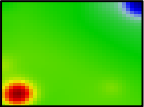

# B.1.112

158 : MW206178.1

S = 0

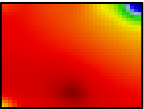

# B.1.139

159 : MT750131.1

S = 0

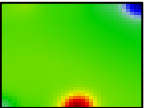

# B.1.181

160 : MW079838.1

S = 0

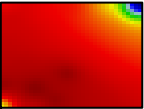

# B.1.2

161 : MW903075.1

S = -0.04

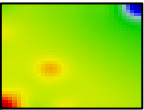

162 : MW898282.1

S = -0.02

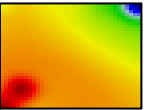

163 : MW891025.1

S = -0.07

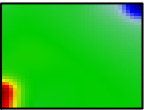

164 : MW892093.1

S = -0.09

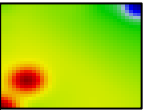

165 : MW897491.1

S = -0.02

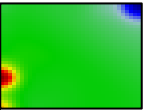

166 : MW888010.1

S = -0.01

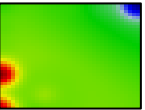

167 : MW871122.1

S = -0.04

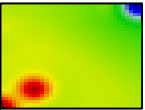

168 : MW865415.1

S = -0.03

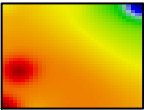

169 : MW865437.1

S = -0.04

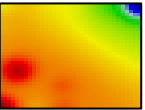

170 : MW849046.1

S = -0.01

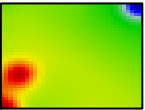

171 : MW849140.1

S = -0.02

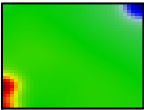

172 : MW850290.1

S = -0.03

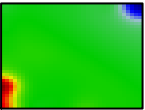

173 : MW837489.1

S = -0.03

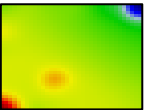

174 : MW813248.1

S = -0.02

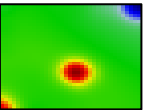

175 : MW816195.1

S = -0.13

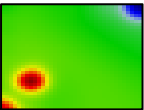

176 : MW804890.1

S = -0.04

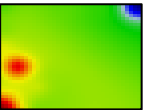

177 : MW782913.1

S = -0.04

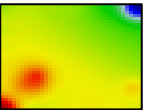

178 : MW782957.1

S = -0.02

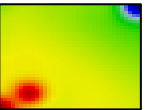

179 : MW773379.1

S = -0.04

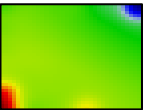

180 : MW766758.1

S = -0.03

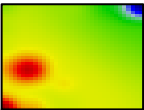

181 : MW739293.1

S = -0.03

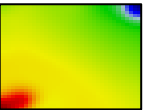

182 : MW739740.1

S = -0.01

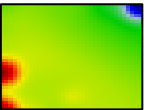

183 : MW731110.1

S = -0.04

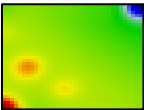

184 : MW731198.1

S = -0.03

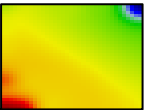

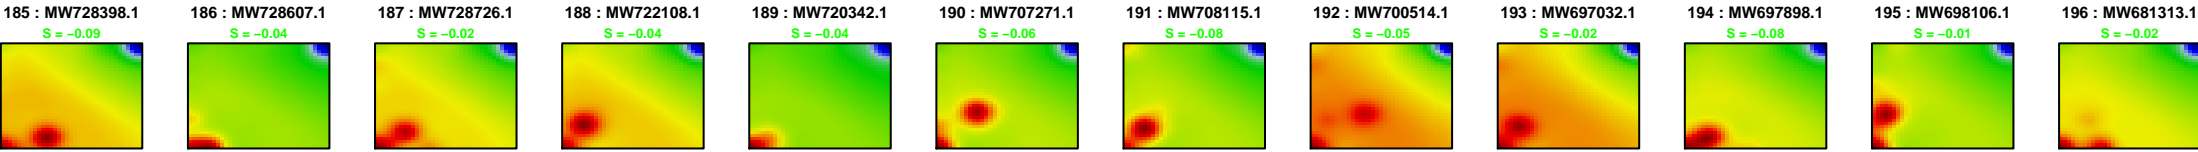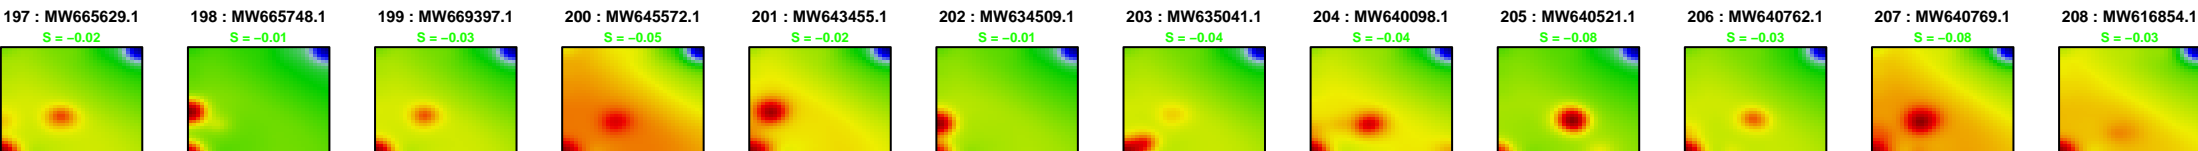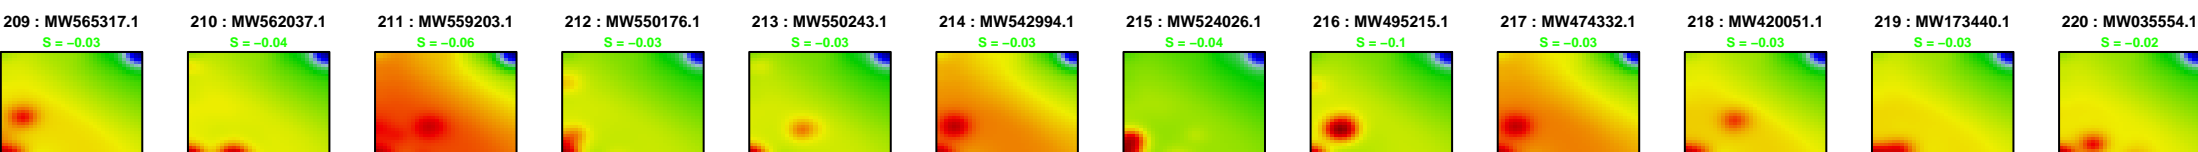

## B.1.232

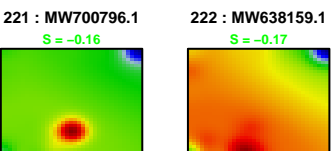

## B.1.234

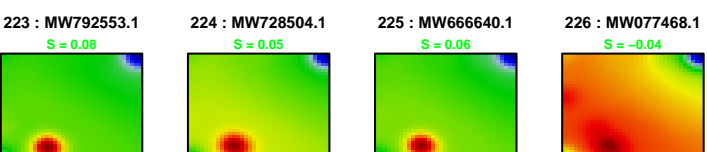

## B.1.240

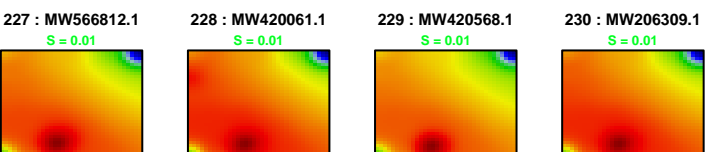

## B.1.243

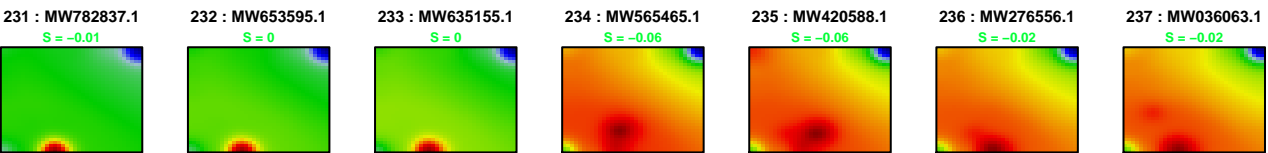

# B.1.258.21

238 : MW453084.1

S = 0

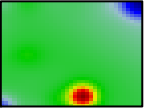

# B.1.265

239 : MW708707.1

S = 0

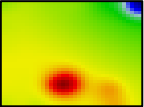

# B.1.274

240 : MW206082.1

S = 0

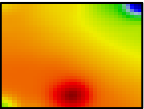

# B.1.284

241 : MW064341.1

S = 0

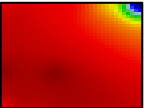

# B.1.298

242 : MW709154.1

S = 0

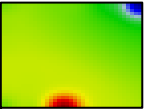

# B.1.305

243 : MW815792.1

S = 0

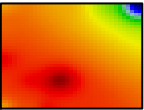

# B.1.320

244 : MT641523.1

S = 0.01

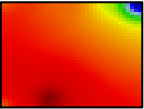

245 : MT628158.1

S = 0.01

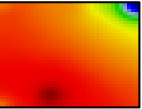

# B.1.349

246 : MW668829.1

S = 0

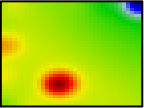

# B.1.351\_VOC

247 : MW621453.1

S = 0.56

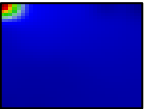

248 : MW913437.1

S = 0.48

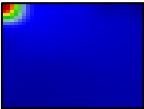

249 : MW914008.1

S = 0.56

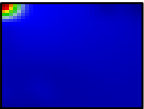

250 : MW914015.1

S = 0.56

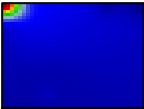

251 : MW914542.1

S = 0.32

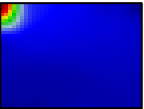

252 : MW905844.1

S = 0.42

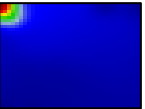

253 : MW907199.1

S = 0.43

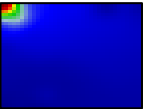

254 : MW907323.1

S = 0.55

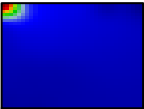

255 : MW908243.1

S = 0.54

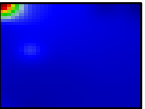

256 : MW908815.1

S = 0.56

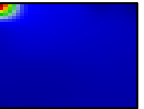

257 : MW909222.1

S = 0.57

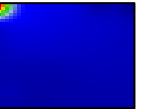

258 : MW849825.1

S = 0.51

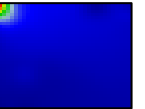

259 : MW795351.1

S = 0.49

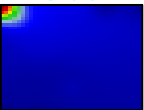

260 : MW796654.1

S = 0.53

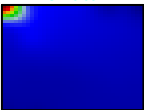

261 : MW792684.1

S = 0.54

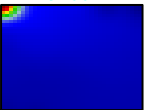

262 : MW792756.1

S = 0.41

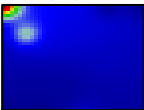

263 : MW793005.1

S = 0.52

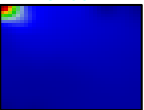

264 : MW773815.1

S = 0.55

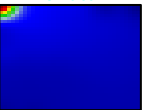

# B.1.36.27

265 : MW691153.1

S = 0

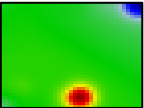

# B.1.360

266 : MW064652.1

S = 0

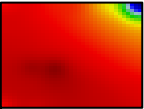

# B.1.369

267 : MT843300.1

S = -0.02

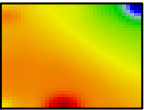

268 : MT827251.1

S = -0.03

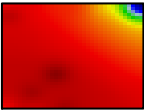

# B.1.371

269 : MT994395.1

S = 0

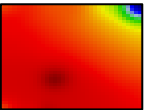

270 : MT642377.1

S = 0

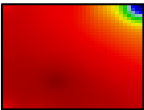

# B.1.382

271 : MW471399.1

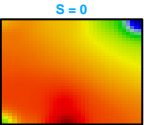

# B.1.384

272 : MW206155.1

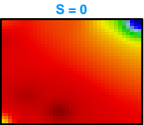

# B.1.400

273 : MW634571.1

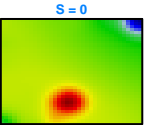

# B.1.427\_VOC

274 : MW902062.1

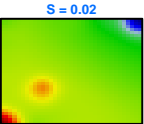

275 : MW903304.1

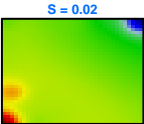

276 : MW904442.1

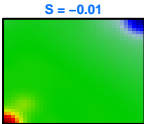

277 : MW891068.1

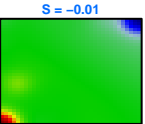

278 : MW869965.1

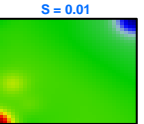

279 : MW850286.1

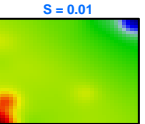

280 : MW796674.1

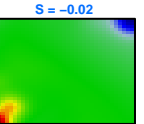

281 : MW792927.1

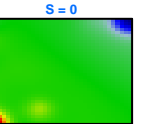

282 : MW777189.1

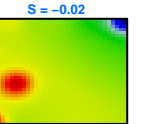

283 : MW766808.1

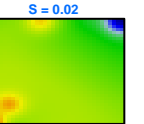

284 : MW737960.1

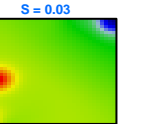

285 : MW739415.1

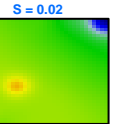

286 : MW730985.1

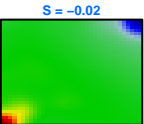

287 : MW731276.1

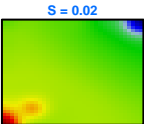

288 : MW731356.1

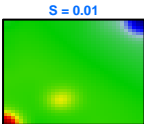

289 : MW731747.1

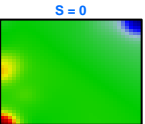

290 : MW638933.1

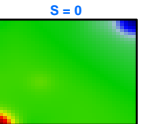

291 : MW564964.1

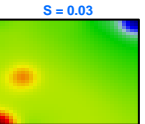

# B.1.429\_VOC

292 : MW903146.1

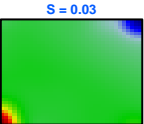

293 : MW890985.1

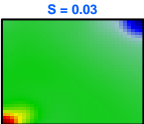

294 : MW891299.1

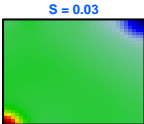

295 : MW850582.1

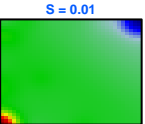

296 : MW855628.1

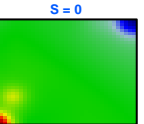

297 : MW855781.1

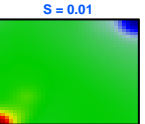

298 : MW848299.1

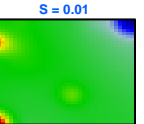

299 : MW849087.1

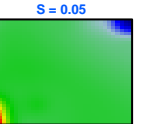

300 : MW850114.1

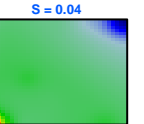

301 : MW837289.1

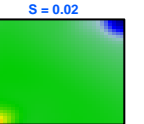

302 : MW837390.1

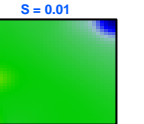

303 : MW821827.1

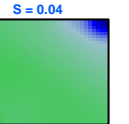

304 : MW796797.1

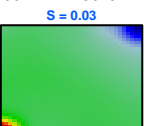

305 : MW796840.1

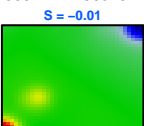

306 : MW788789.1

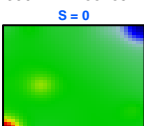

307 : MW792842.1

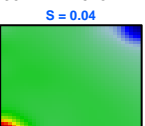

308 : MW792999.1

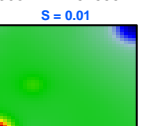

309 : MW793073.1

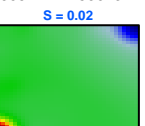

310 : MW780400.1

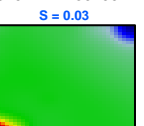

311 : MW781335.1

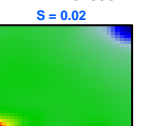

312 : MW767571.1

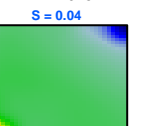

313 : MW763186.1

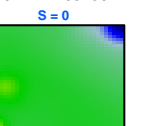

314 : MW766623.1

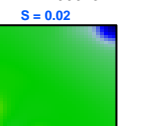

315 : MW766643.1

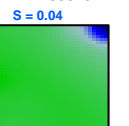

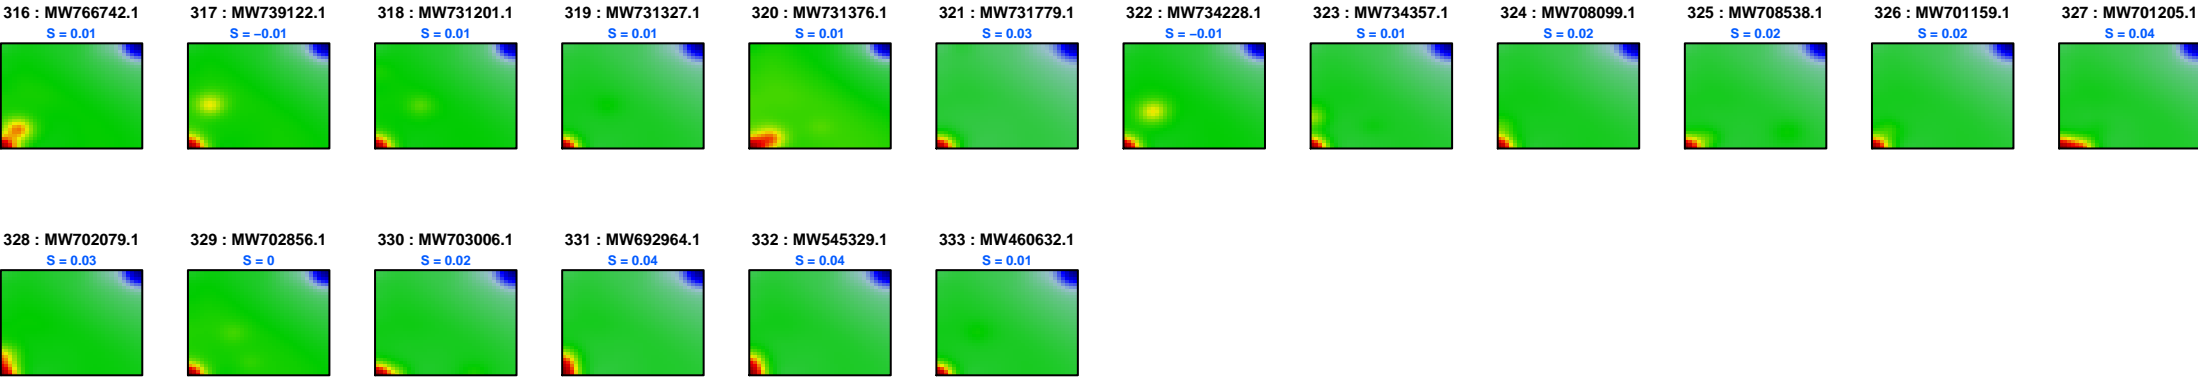

B.1.436

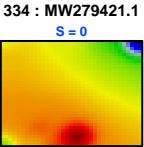

B.1.444

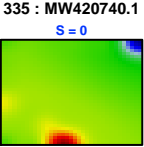

B.1.446

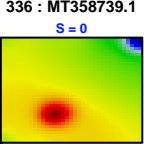

B.1.492

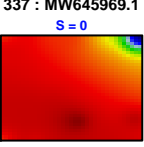

B.1.517

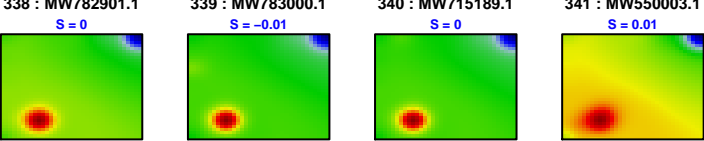

# B.1.525\_VOC

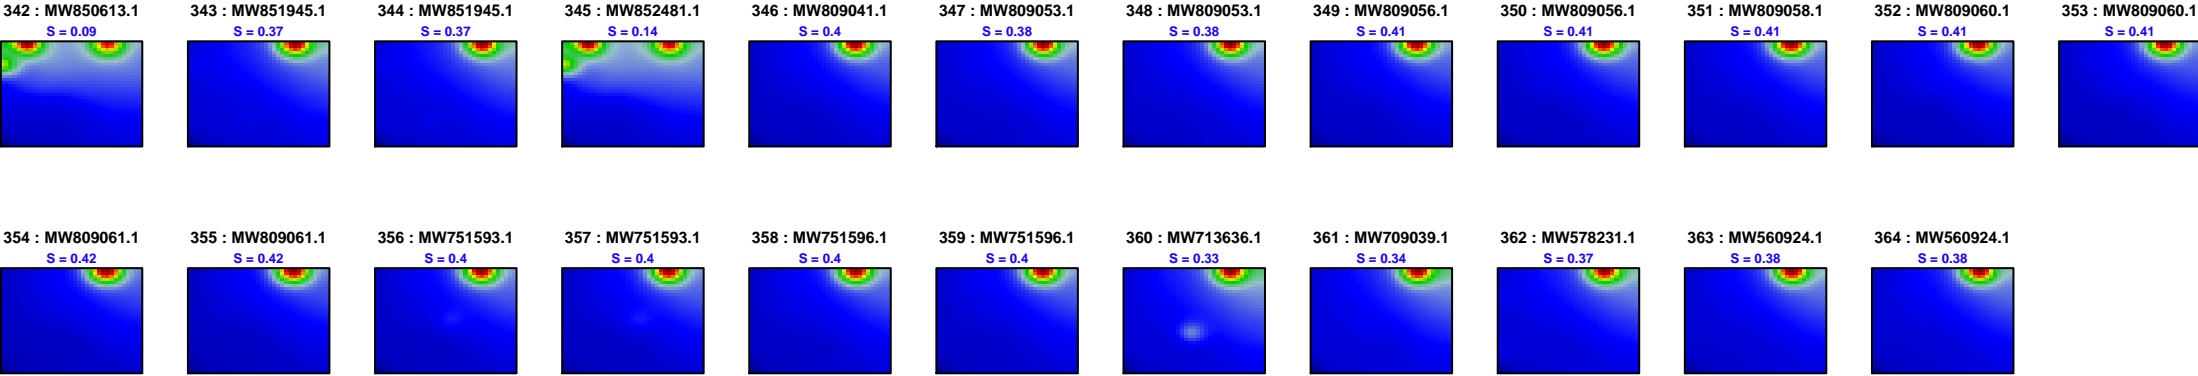

# B.1.526

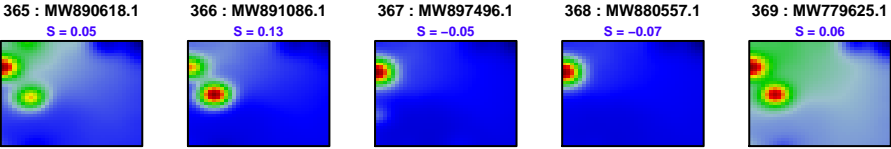

# B.1.526.2

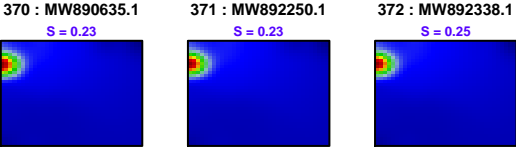

# B.1.544

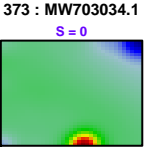

# B.1.565

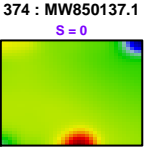

# B.1.568

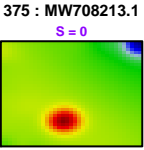

B.1.575

376 : MW902922.1

S = 0

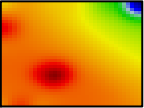

B.1.590

377 : MW191464.1

S = 0

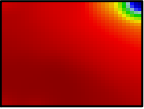

B.1.595

378 : MW735956.1

S = -0.15

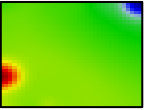

379 : MW728639.1

S = -0.2

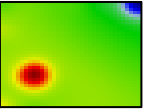

B.1.595.1

380 : MW286639.1

S = 0

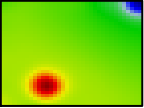

B.1.596

381 : MW904425.1

S = 0.03

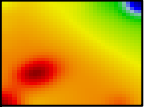

382 : MW891324.1

S = 0.05

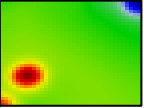

383 : MW820254.1

S = 0.02

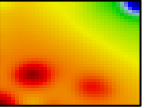

B.1.617.1\_VOC

384 : MW903294.1

S = 0

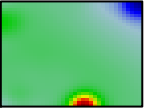

B.19

385 : MT438750.1

S = 0

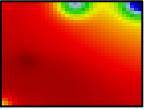



# B.40

386 : MT507274.1

S = 0

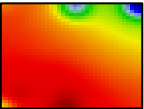

# B.46

387 : MT534317.1

S = 0

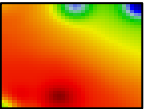

# C.26

388 : MW365070.1

S = 0

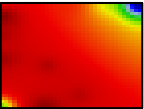

# C.35

389 : MW454582.1

S = 0

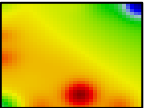

# D.2

390 : MT970009.1

S = 0.1

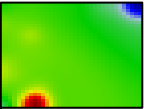

391 : MW321111.1

S = 0.03

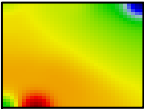

392 : MW321326.1

S = 0.05

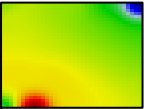

393 : MW277061.1

S = 0.04

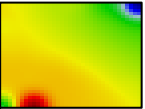

394 : MW277356.1

S = 0.06

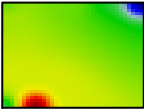

395 : MW184473.1

S = 0.03

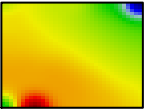

396 : MW184514.1

S = 0.07

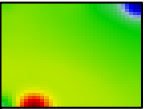

397 : MW184759.1

S = 0.1

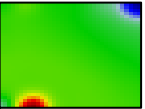

398 : MW185500.1

S = 0.09

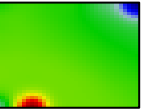

399 : MW153235.1

S = 0.07

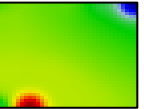

400 : MW153463.1

S = 0.04

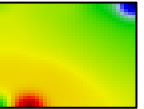

401 : MW153476.1

S = 0.09

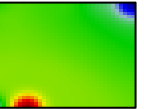

402 : MW154432.1

S = 0.06

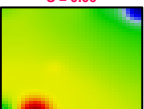

403 : MW155350.1

S = 0.08

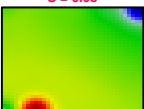

404 : MW156308.1

S = 0.07

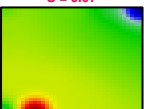

405 : MW156515.1

S = 0.05

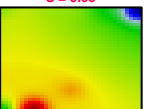

406 : MW156556.1

S = 0.03

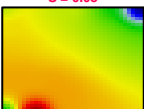

407 : MW157011.1

S = 0.03

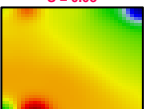

408 : MT969961.1

S = 0.03

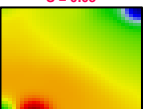

409 : MT970206.1

S = 0.04

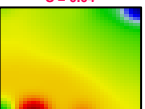

410 : MT970602.1

S = -0.38

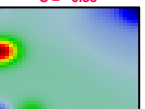

411 : MT970638.1

S = 0.04

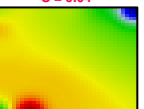

412 : MT970641.1

S = 0.03

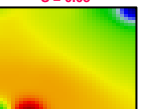

413 : MT970660.1

S = 0.07

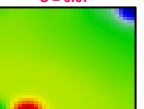

414 : MT970713.1

S = 0.04

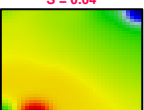

415 : MT970730.1

S = 0.07

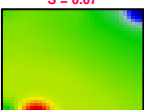

416 : MT970759.1

S = 0.03

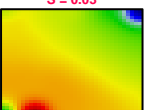

417 : MT970883.1

S = 0.04

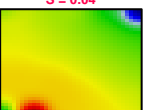

418 : MT970912.1

S = 0.07

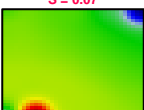

419 : MT970995.1

S = 0.05

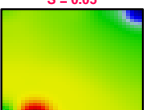

420 : MT970996.1

S = 0.07

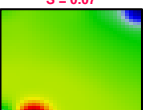

421 : MT971103.1

S = 0.05

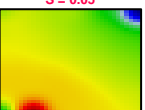

422 : MT971665.1

S = 0.06

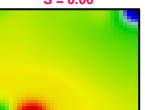

423 : MT971767.1

S = 0.04

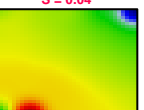

424 : MT971902.1

S = 0.07

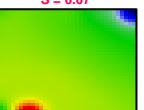

425 : MT971989.1

S = 0.07

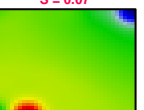

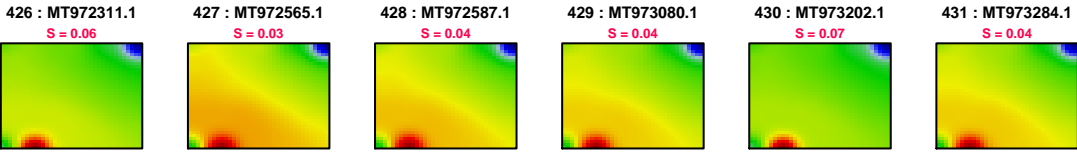

P.1\_VOC

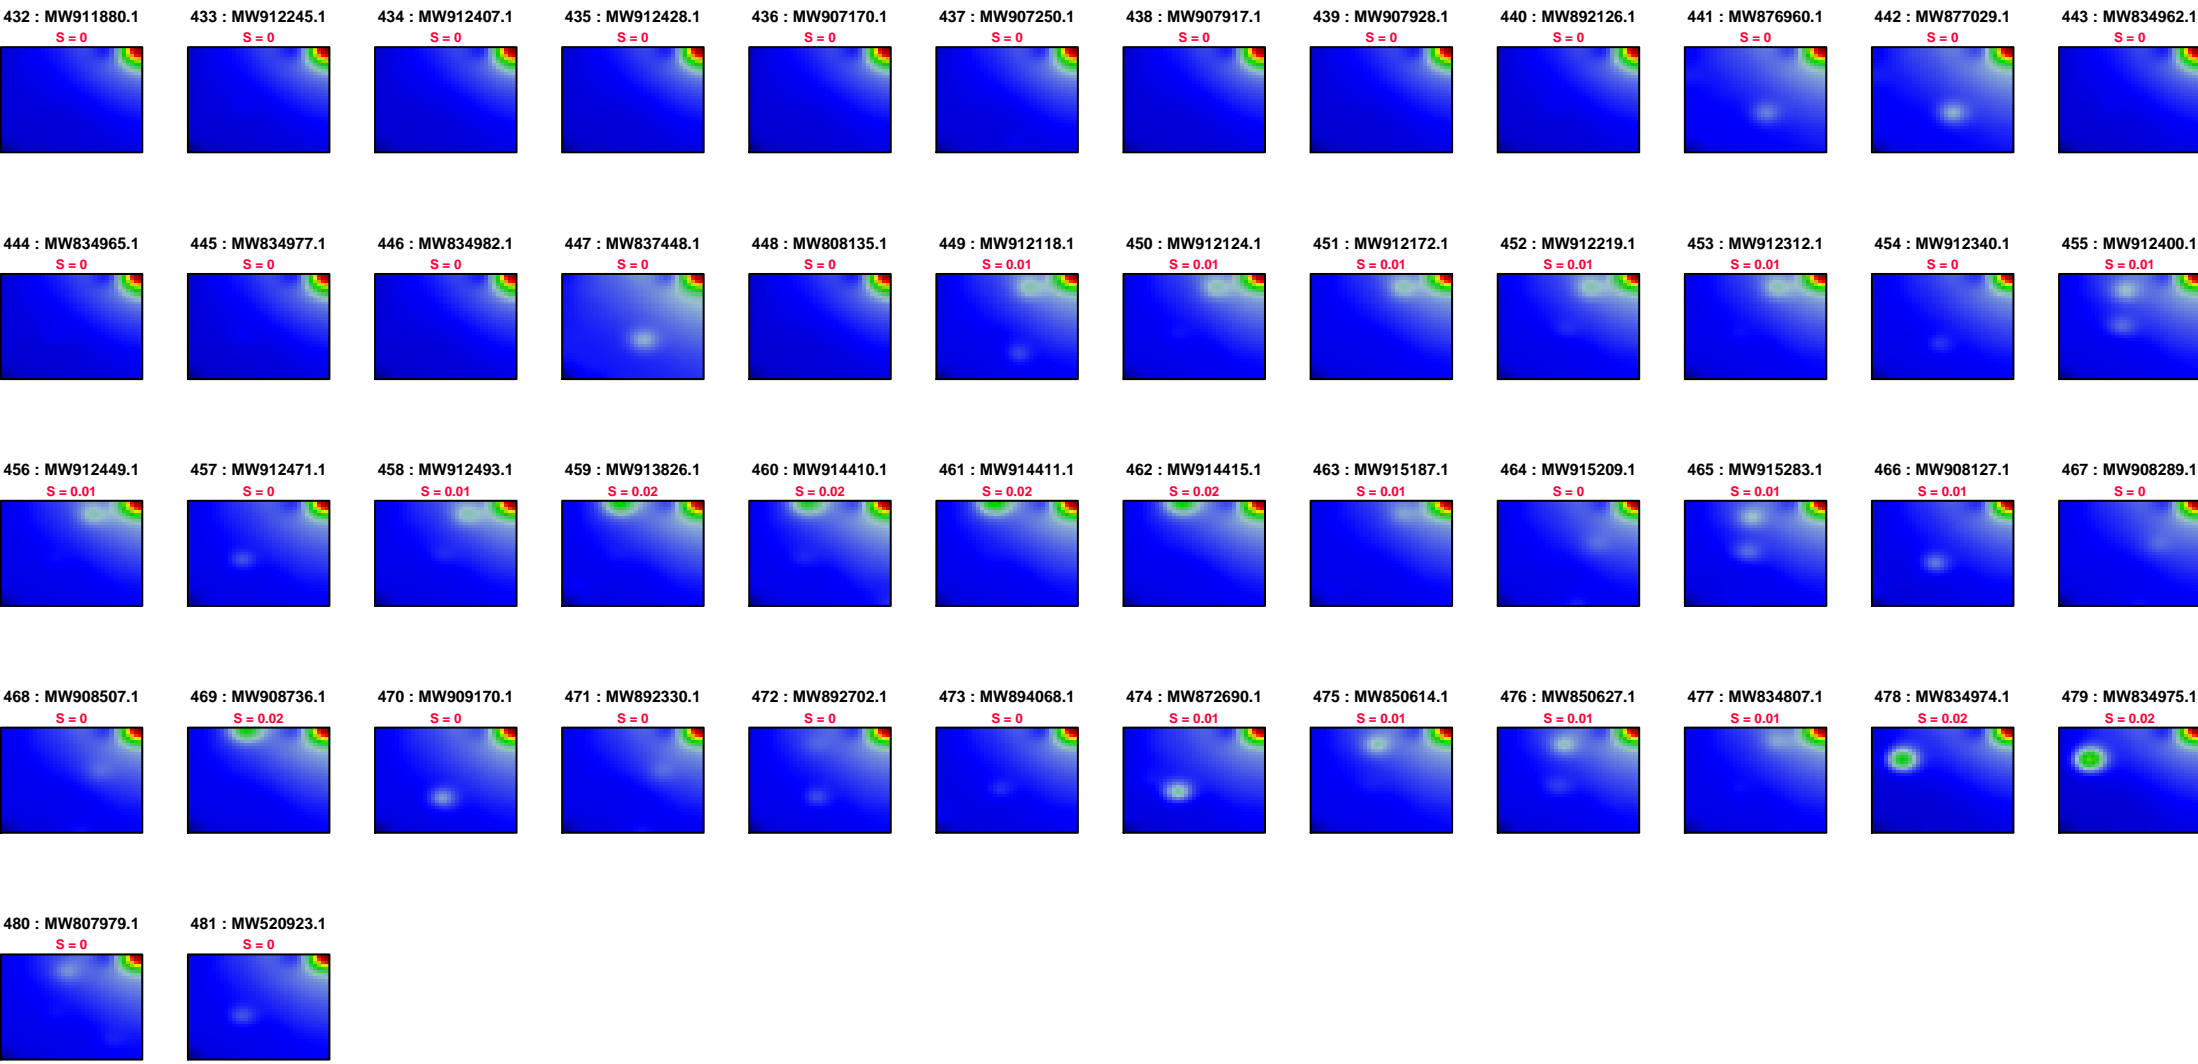

W.1

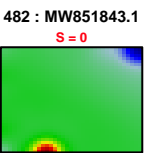

## B.1.351\_VOC x

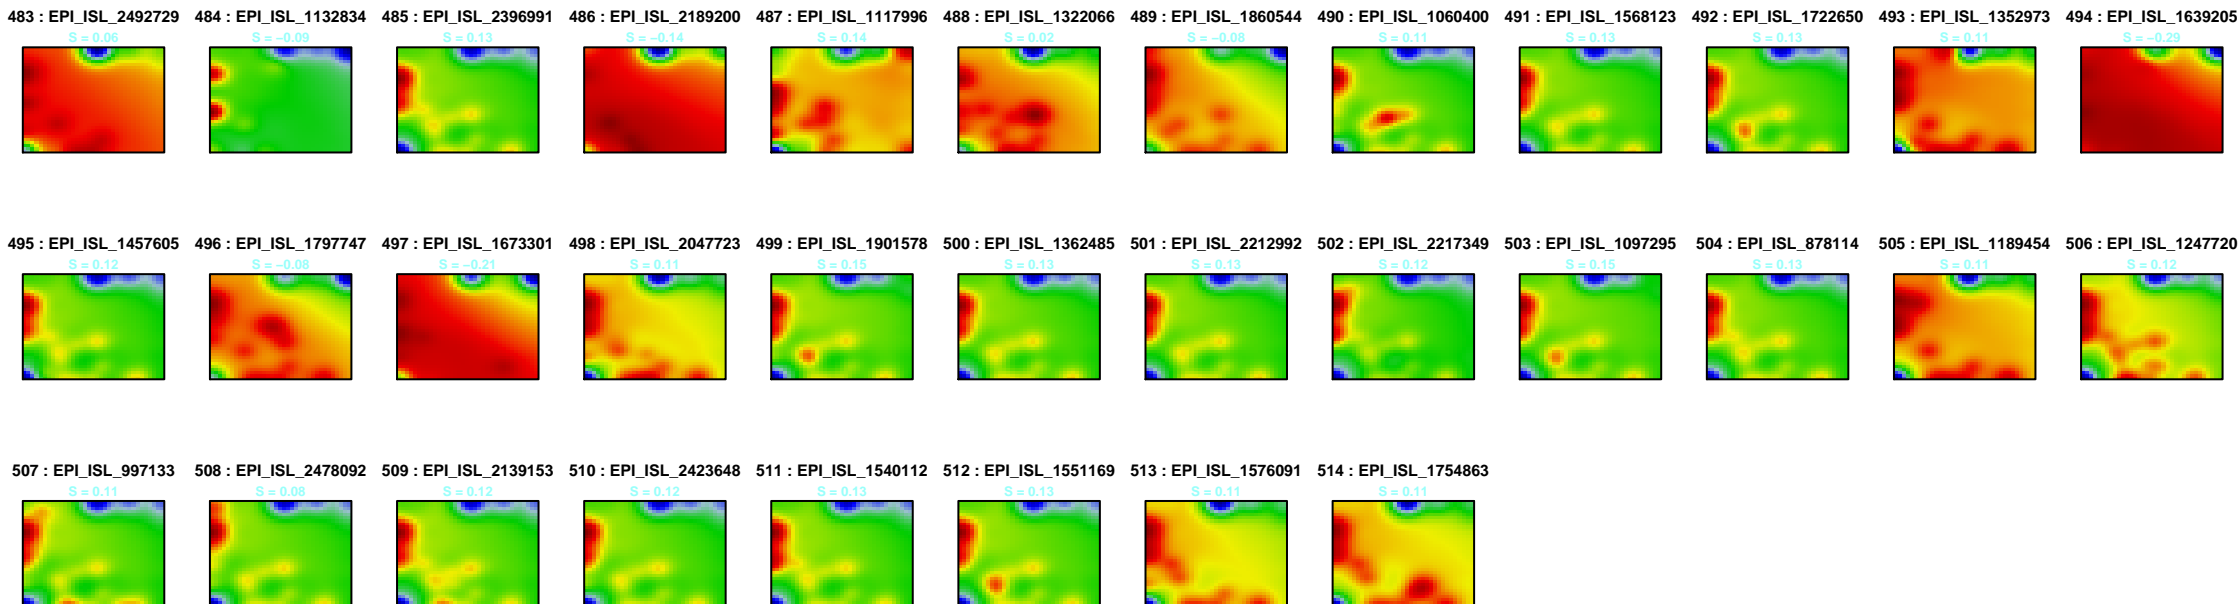

## B.1.525\_VOC x

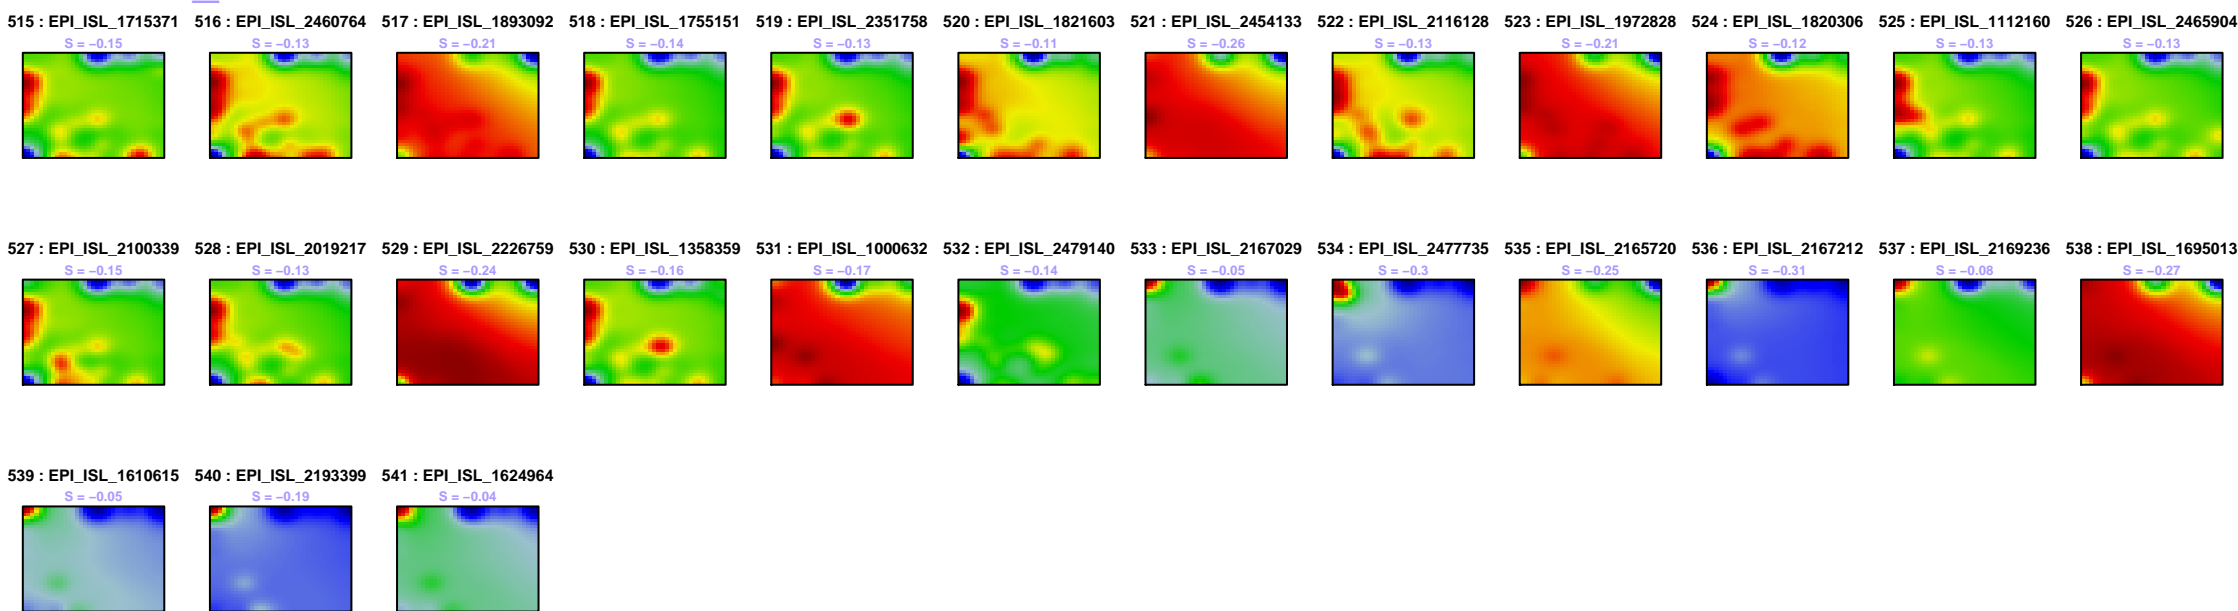

## B.1.617.1\_VOC x

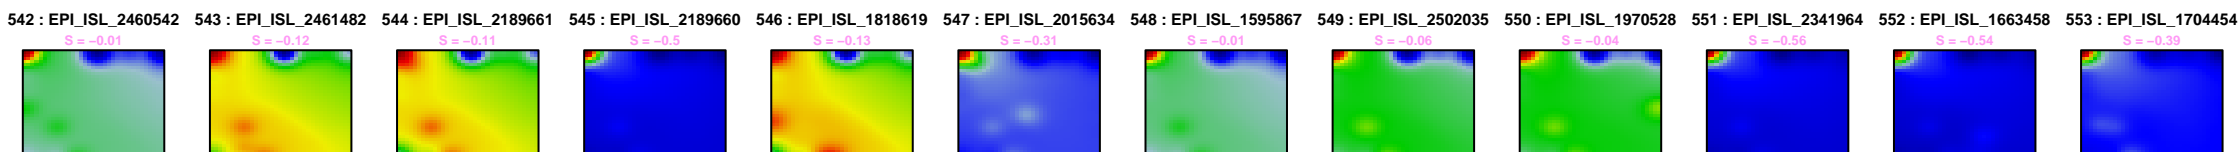

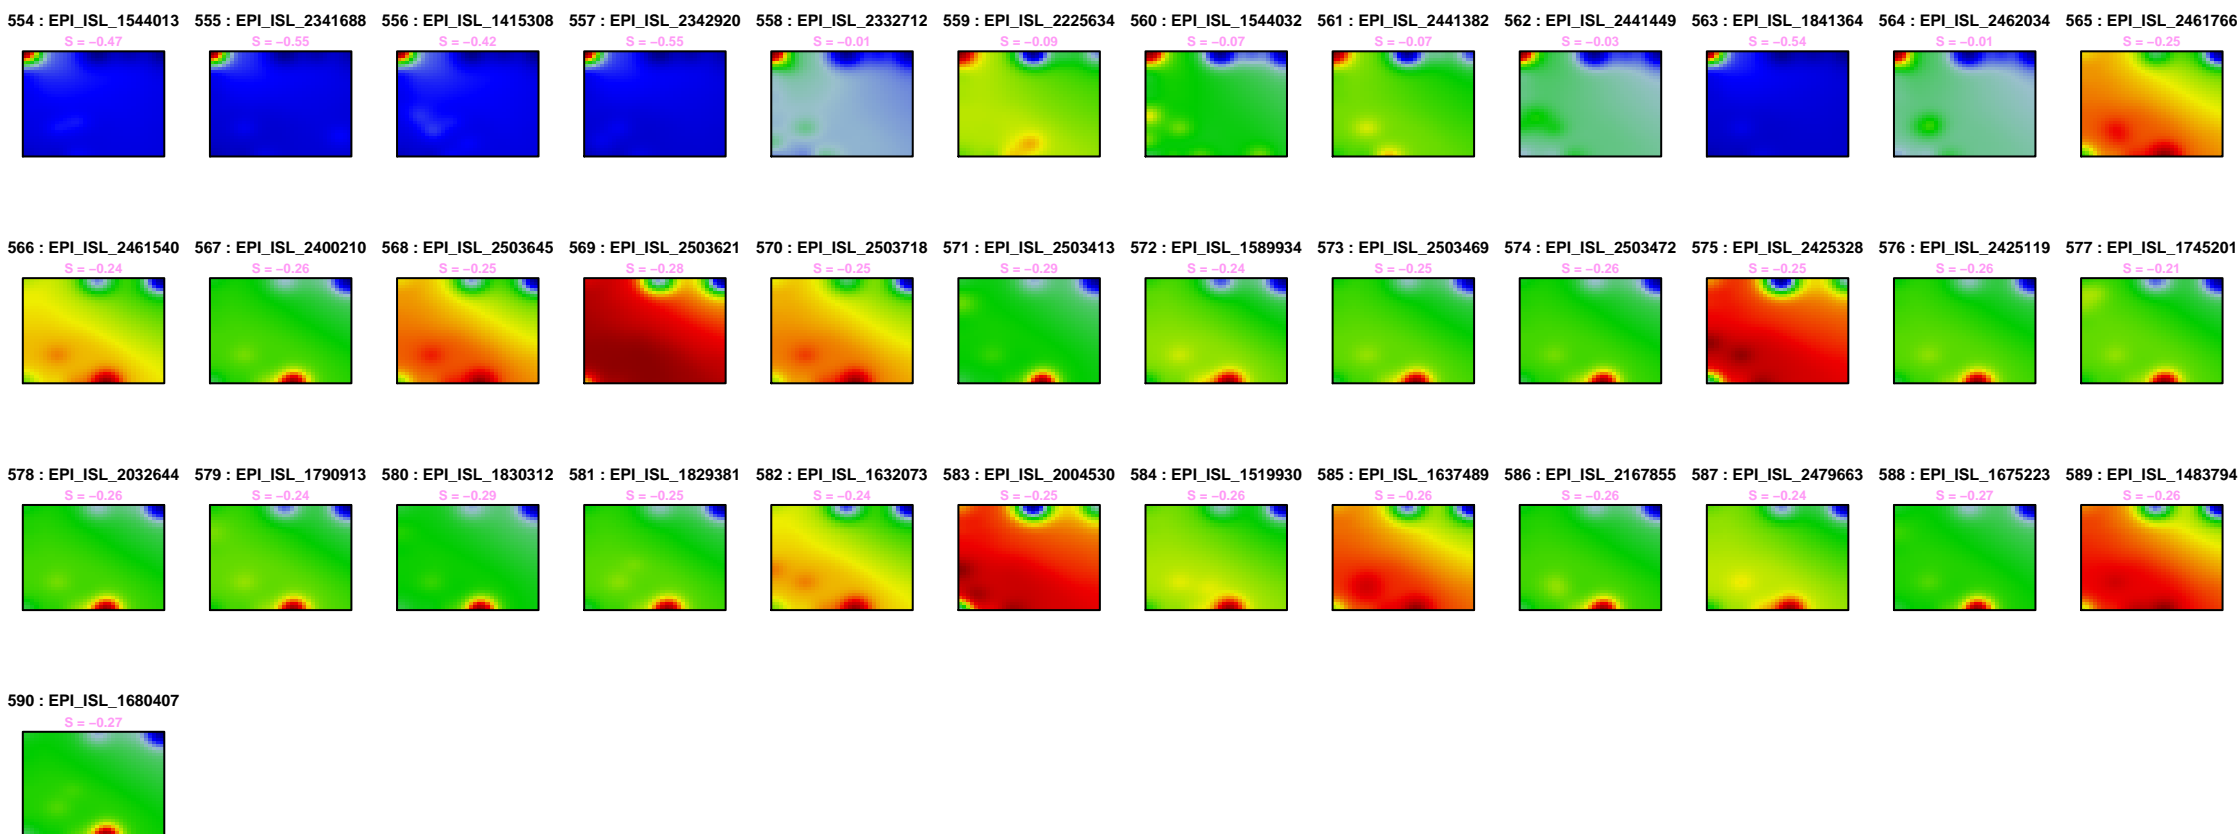

## B.1.617.2\_VOC x

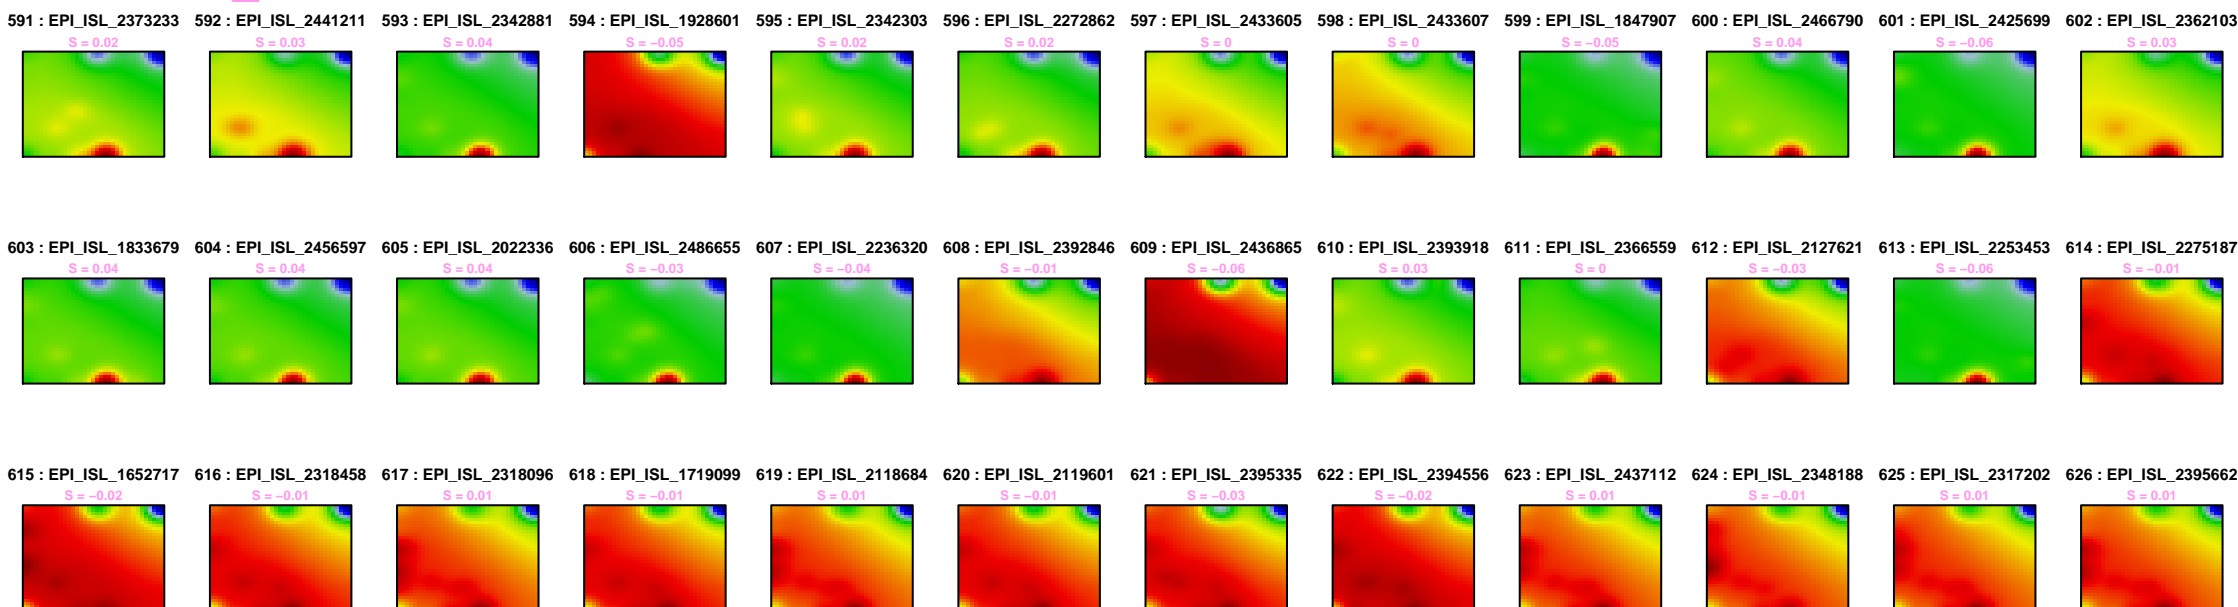

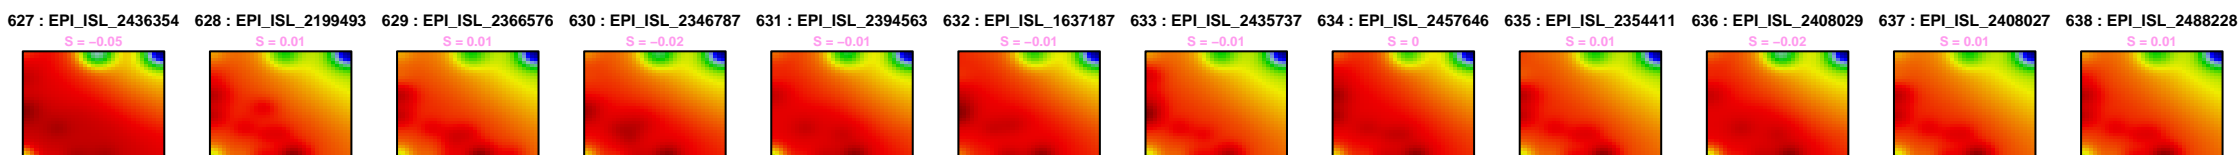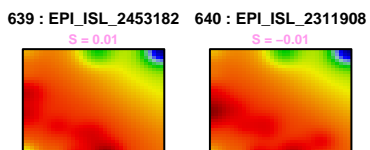

C.37\_VOC x

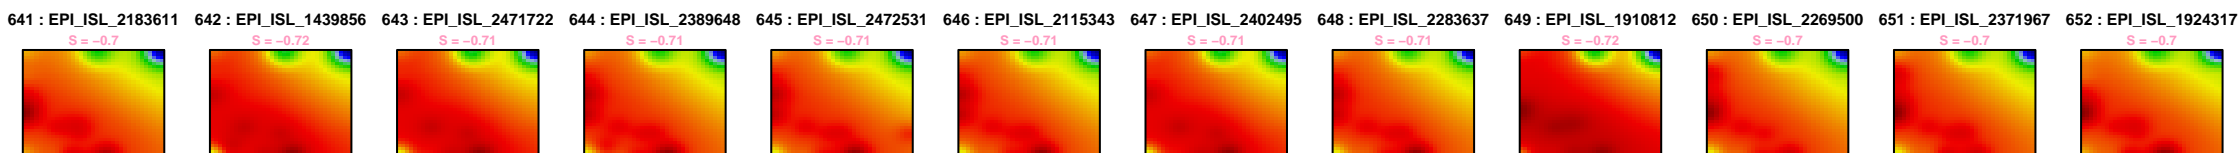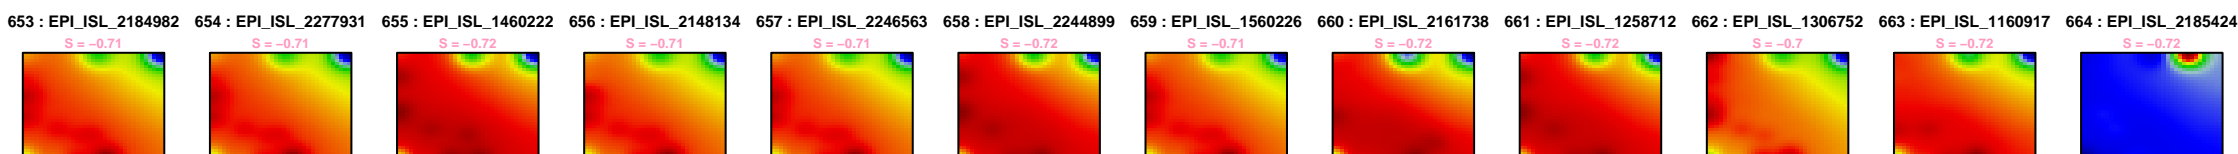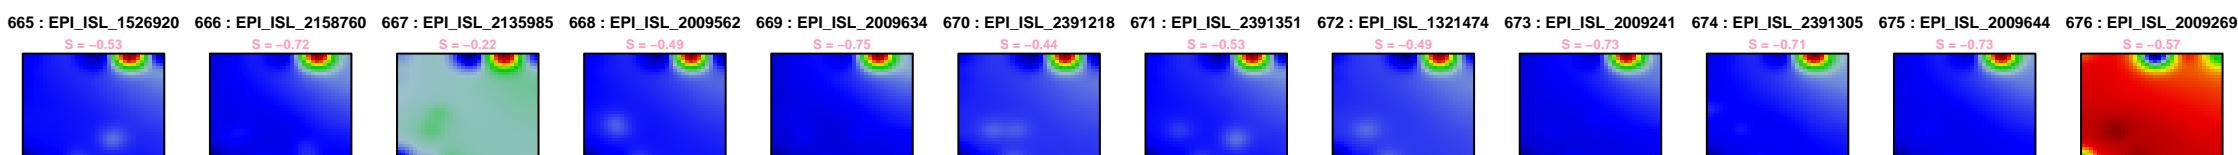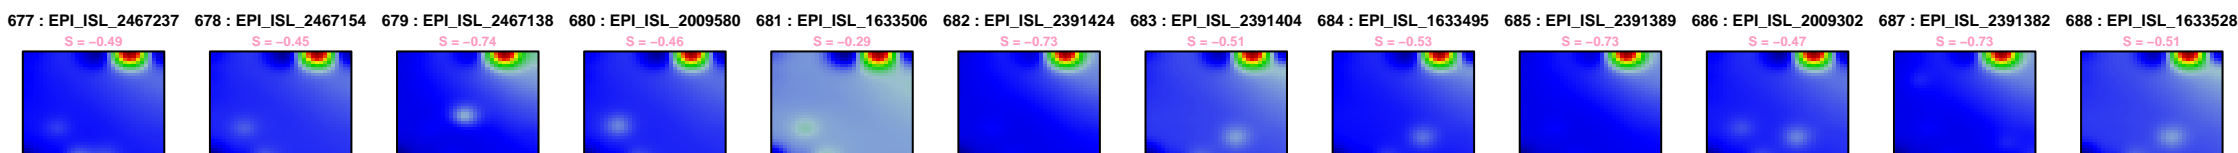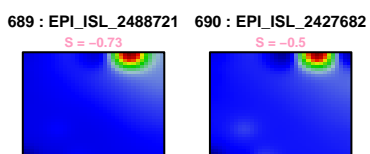

*P.3\_VOC x*

691 : EPI\_ISL\_1213585    692 : EPI\_ISL\_2189441    693 : EPI\_ISL\_2188206    694 : EPI\_ISL\_2189233    695 : EPI\_ISL\_2156467    696 : EPI\_ISL\_2156468    697 : EPI\_ISL\_1122441    698 : EPI\_ISL\_1213535    699 : EPI\_ISL\_1122428    700 : EPI\_ISL\_1213509    701 : EPI\_ISL\_1213556    702 : EPI\_ISL\_1213521

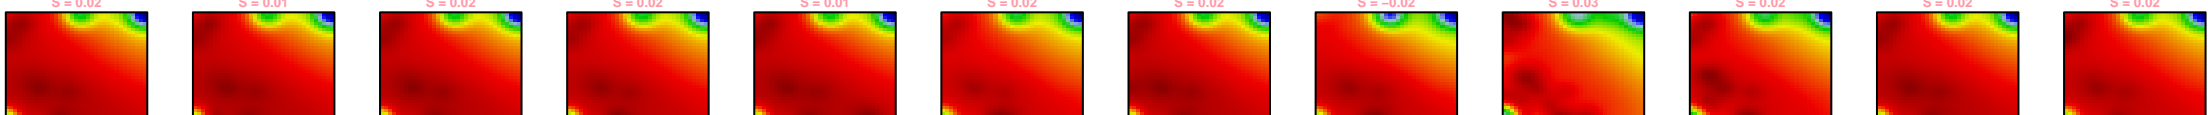

703 : EPI\_ISL\_1213571 704 : EPI\_ISL\_2189296 705 : EPI\_ISL\_1213551 706 : EPI\_ISL\_1213546 707 : EPI\_ISL\_1122435 708 : EPI\_ISL\_1122427 709 : EPI\_ISL\_1122451 710 : EPI\_ISL\_1213547 711 : EPI\_ISL\_1122439 712 : EPI\_ISL\_1213513 713 : EPI\_ISL\_1213561 714 : EPI\_ISL\_1213516

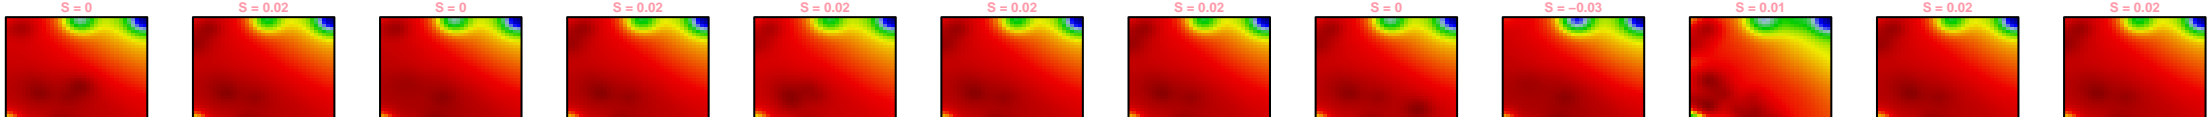

715 : EPI\_ISL\_2156599 716 : EPI\_ISL\_1122456 717 : EPI\_ISL\_2189035 718 : EPI\_ISL\_1213566 719 : EPI\_ISL\_1213565 720 : EPI\_ISL\_2156359 721 : EPI\_ISL\_1122457 722 : EPI\_ISL\_2188811 723 : EPI\_ISL\_2189090 724 : EPI\_ISL\_2156354 725 : EPI\_ISL\_1213580 726 : EPI\_ISL\_2171098

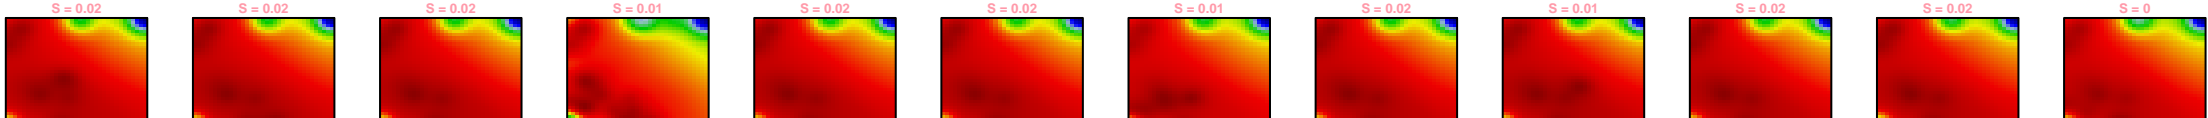

727: EPI\_ISL\_2156357 728: EPI\_ISL\_2189152 729: EPI\_ISL\_2156294 730: EPI\_ISL\_2349790 731: EPI\_ISL\_1652091 732: EPI\_ISL\_1571348 733: EPI\_ISL\_1354944 734: EPI\_ISL\_1522133 735: EPI\_ISL\_1792918 736: EPI\_ISL\_1522134 737: EPI\_ISL\_1275649 738: EPI\_ISL\_1256377

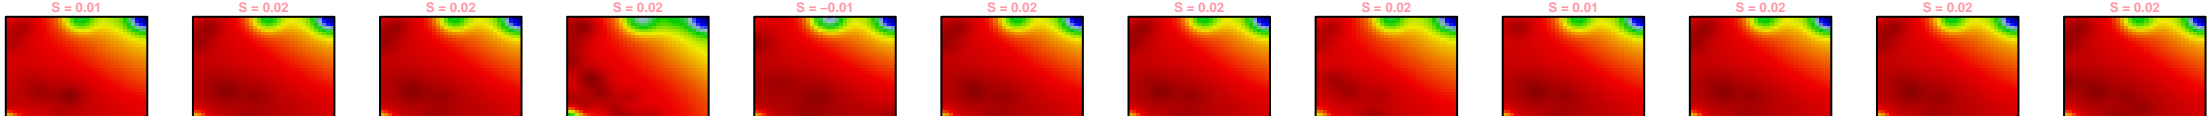

739 : EPI\_ISL\_2181026 740 : EPI\_ISL\_1273082

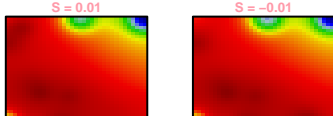

A

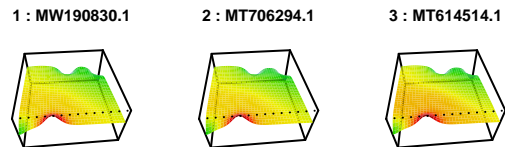

A.1

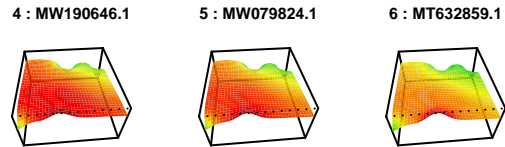

B

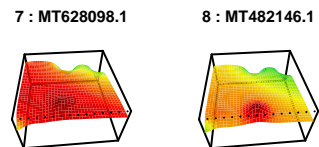

B.1

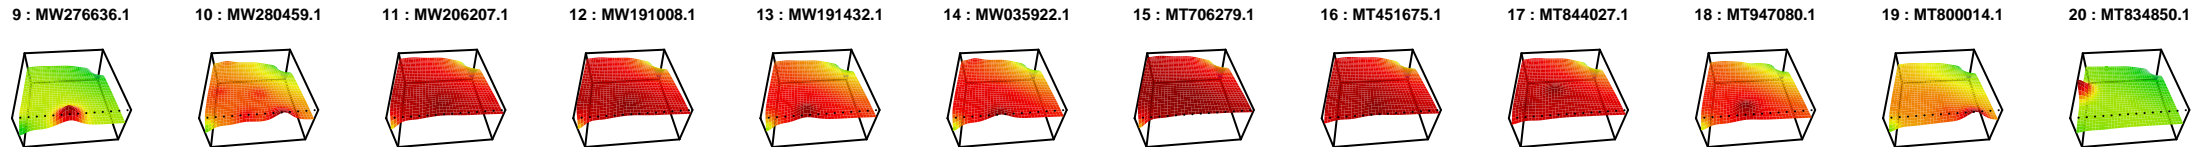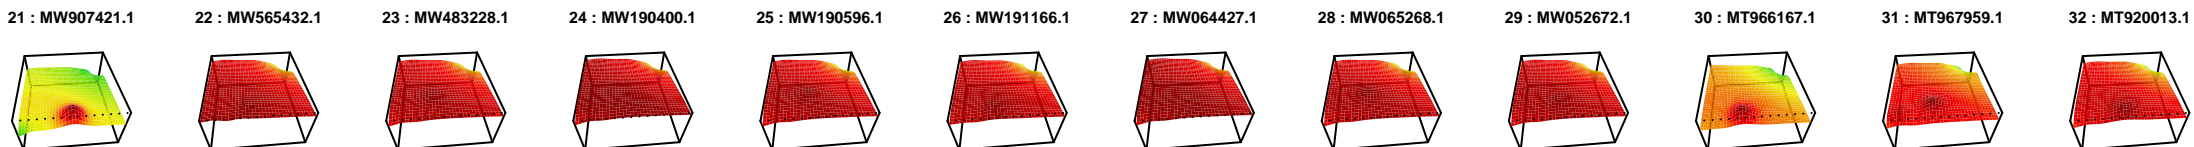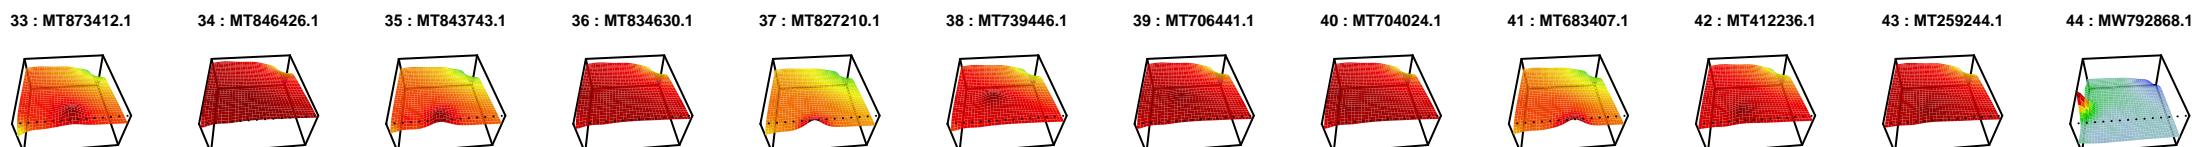

B.1.1

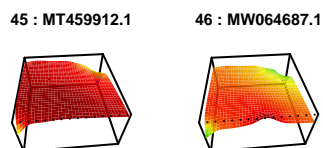

# B.1.1.136

47 : MT972137.1

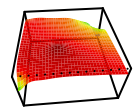

# B.1.1.169

48 : MW279423.1

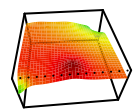

# B.1.1.186

49 : MW719920.1

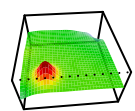

# B.1.1.205

50 : MW306370.1

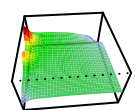

# B.1.1.222

51 : MW681161.1

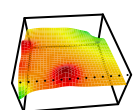

52 : MW653612.1

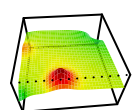

# B.1.1.228

53 : MW645720.1

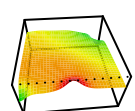

54 : MW206329.1

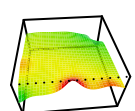

# B.1.1.231

55 : MW521681.1

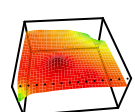



# B.1.1.244

56 : MW206601.1

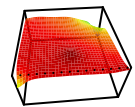

# B.1.1.291

57 : MT831212.1

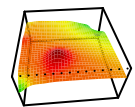

58 : MT831708.1

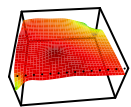

# B.1.1.316

59 : MW864396.1

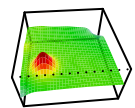

60 : MW666340.1

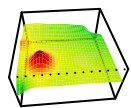

# B.1.1.416

61 : MW738279.1

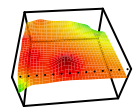

# B.1.1.432

62 : MW763480.1

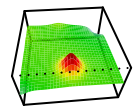

63 : MW521794.1

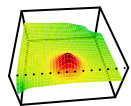

# B.1.1.434

64 : MW668844.1

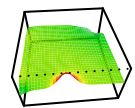

# B.1.1.519

65 : MW903995.1

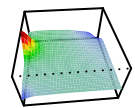

66 : MW849227.1

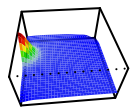

67 : MW849880.1

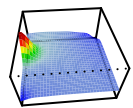

68 : MW681413.1

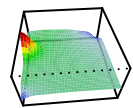

69 : MW667310.1

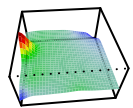

B.1.1.7\_VOC

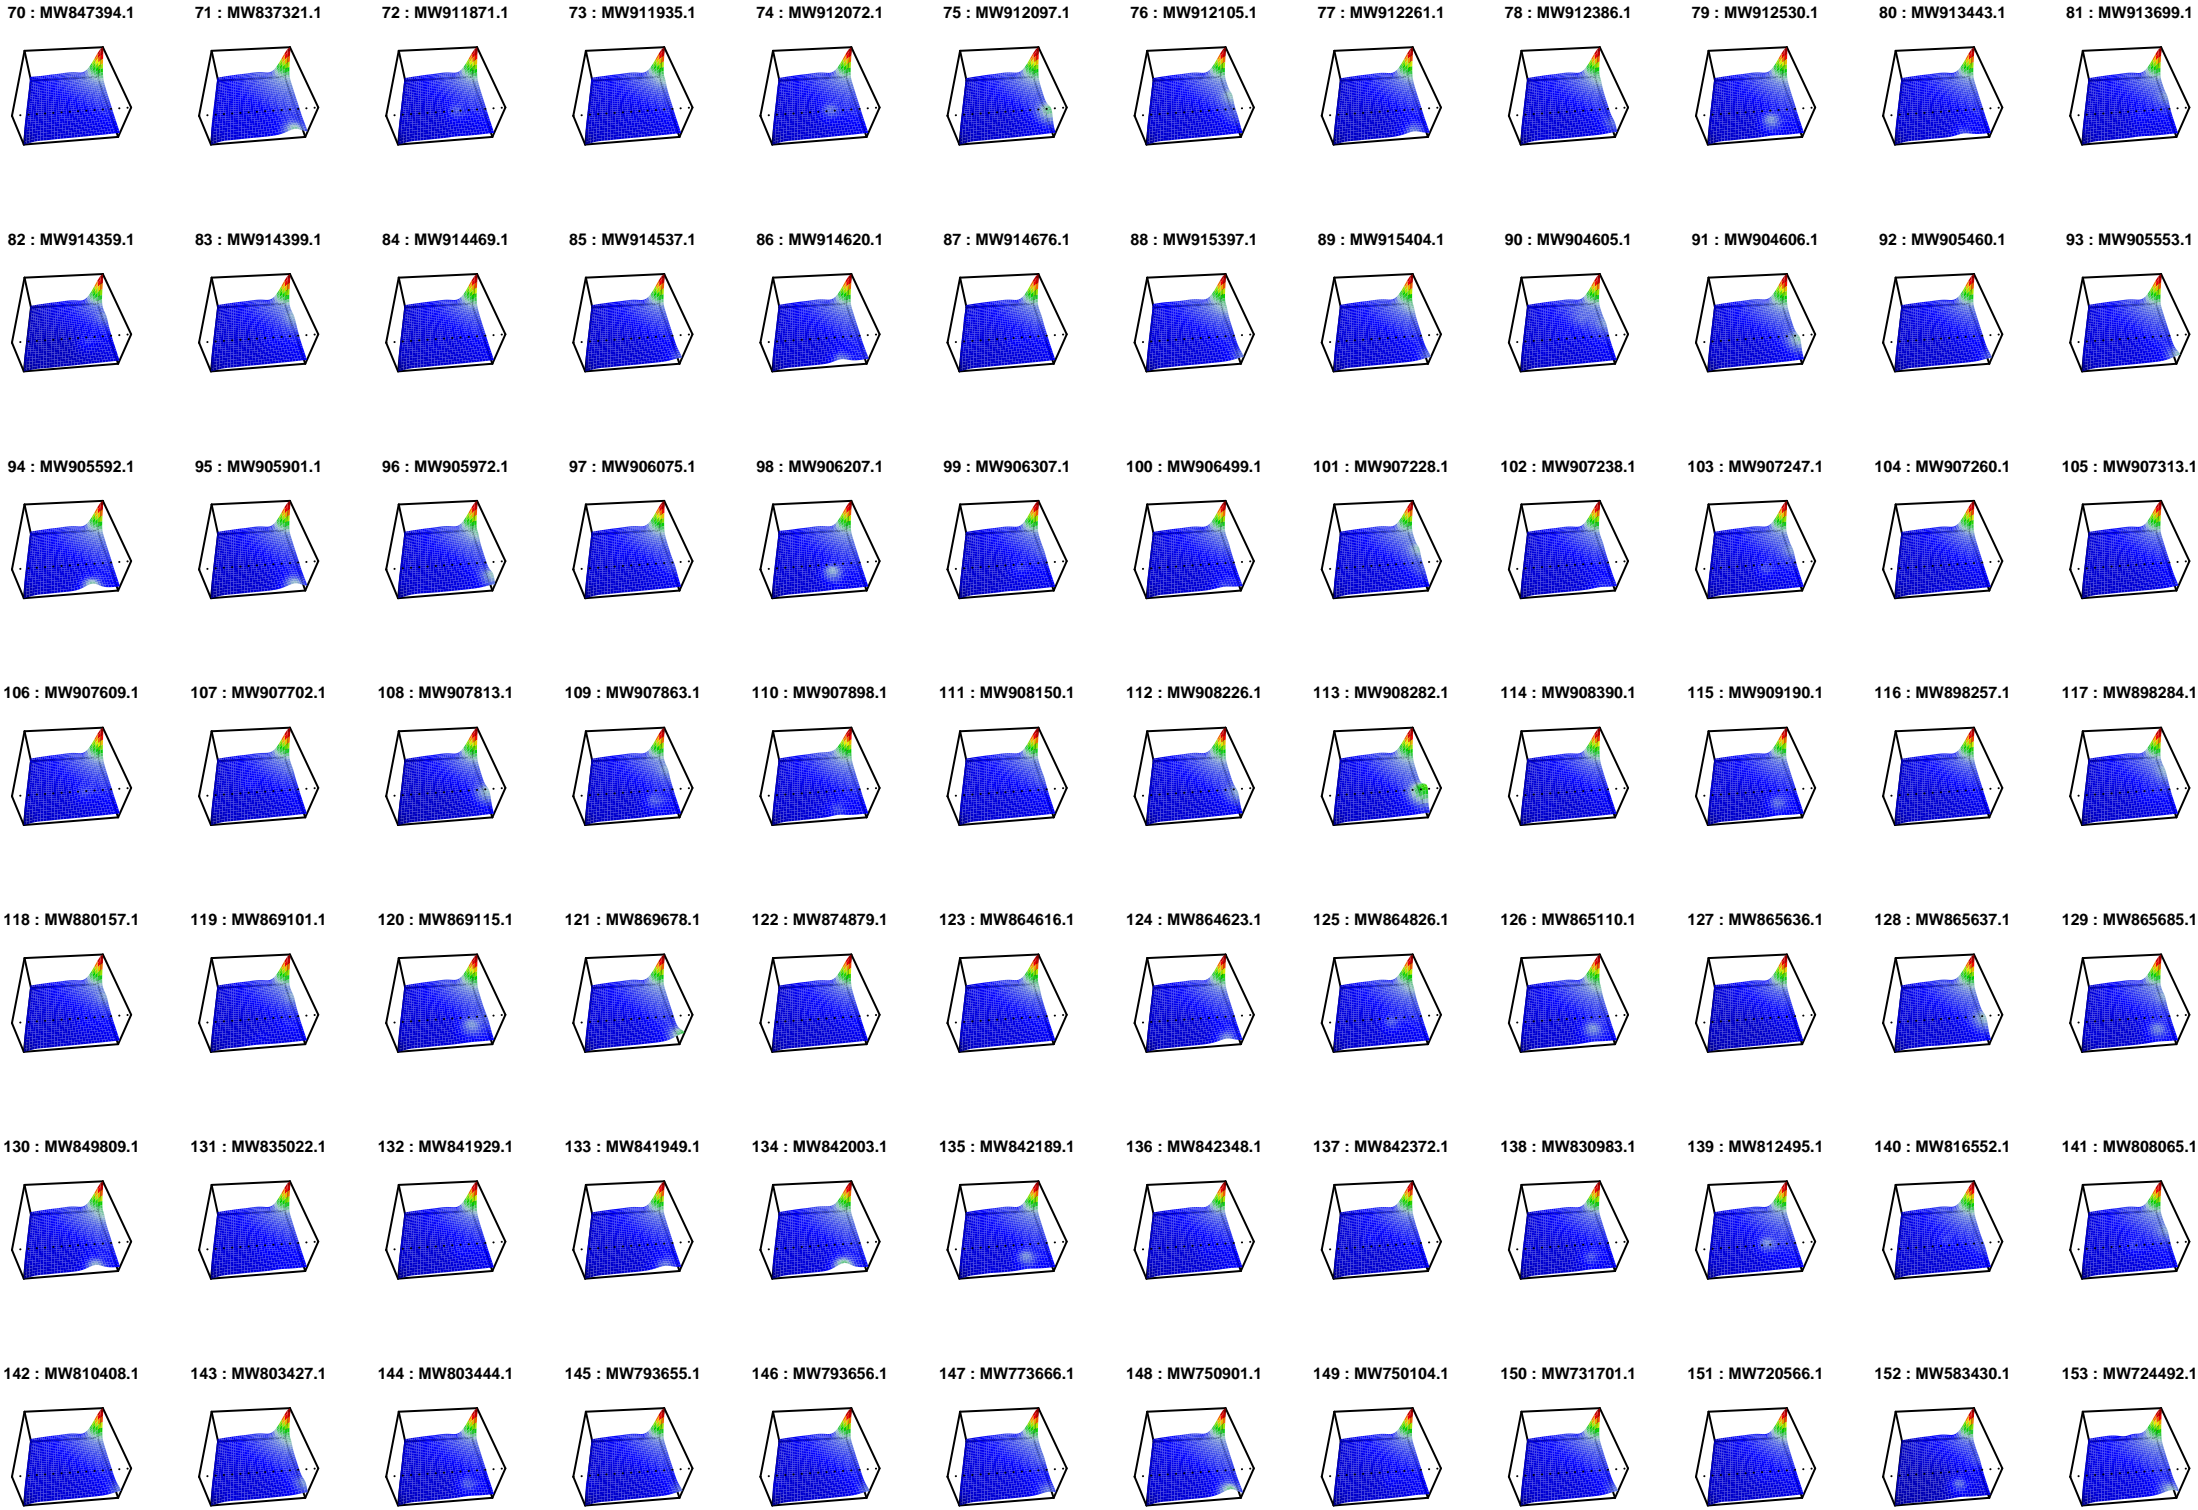

# B.1.110

154 : MW364999.1

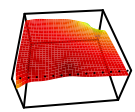

# B.1.110.3

155 : MW825510.1

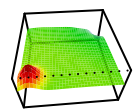

156 : MW813533.1

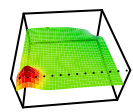

157 : MW772211.1

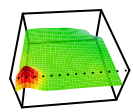

# B.1.112

158 : MW206178.1

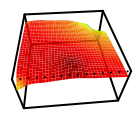

# B.1.139

159 : MT750131.1

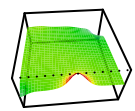

# B.1.181

160 : MW079838.1

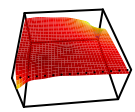

# B.1.2

161 : MW903075.1

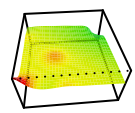

162 : MW898282.1

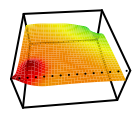

163 : MW891025.1

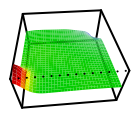

164 : MW892093.1

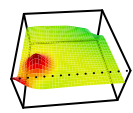

165 : MW897491.1

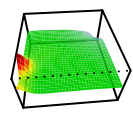

166 : MW888010.1

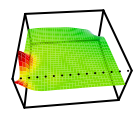

167 : MW871122.1

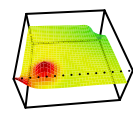

168 : MW865415.1

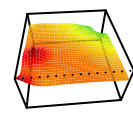

169 : MW865437.1

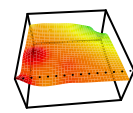

170 : MW849046.1

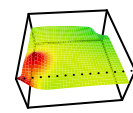

171 : MW849140.1

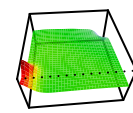

172 : MW850290.1

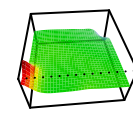

173 : MW837489.1

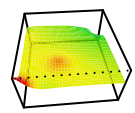

174 : MW813248.1

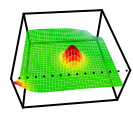

175 : MW816195.1

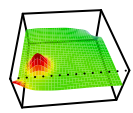

176 : MW804890.1

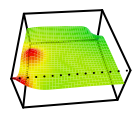

177 : MW782913.1

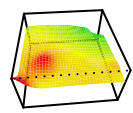

178 : MW782957.1

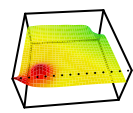

179 : MW773379.1

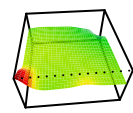

180 : MW766758.1

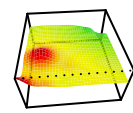

181 : MW739293.1

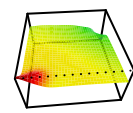

182 : MW739740.1

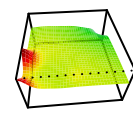

183 : MW731110.1

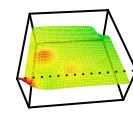

184 : MW731198.1

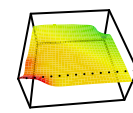

185 : MW728398.1    186 : MW728607.1    187 : MW728726.1    188 : MW722108.1    189 : MW720342.1    190 : MW707271.1    191 : MW708115.1    192 : MW700514.1    193 : MW697032.1    194 : MW697898.1    195 : MW698106.1    196 : MW681313.1

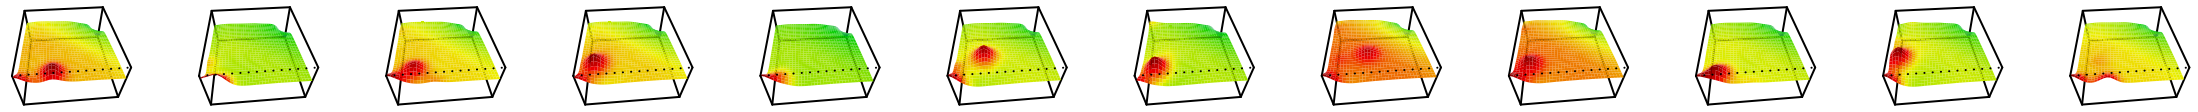

197 : MW665629.1    198 : MW665748.1    199 : MW669397.1    200 : MW645572.1    201 : MW643455.1    202 : MW634509.1    203 : MW635041.1    204 : MW640098.1    205 : MW640521.1    206 : MW640762.1    207 : MW640769.1    208 : MW616854.1

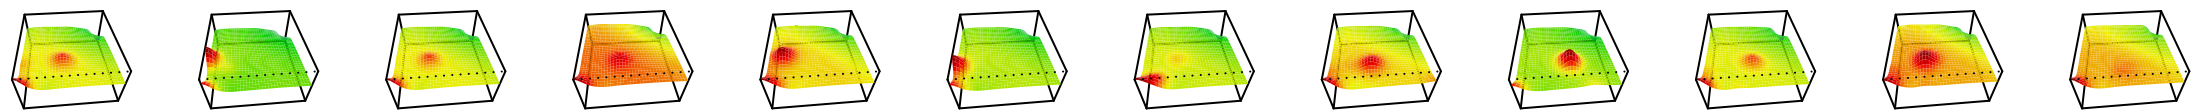

209 : MW565317.1    210 : MW562037.1    211 : MW559203.1    212 : MW550176.1    213 : MW550243.1    214 : MW542994.1    215 : MW524026.1    216 : MW495215.1    217 : MW474332.1    218 : MW420051.1    219 : MW173440.1    220 : MW035554.1

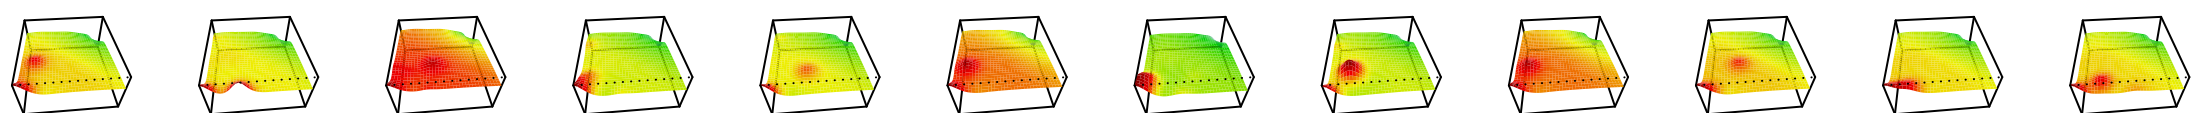

**B.1.232**

221 : MW700796.1    222 : MW638159.1

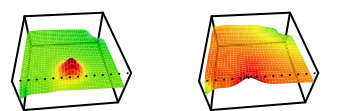

**B.1.234**

223 : MW792553.1    224 : MW728504.1    225 : MW666640.1    226 : MW077468.1

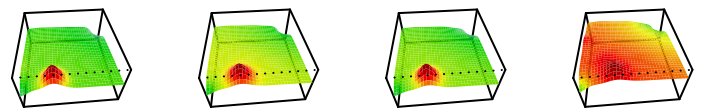

**B.1.240**

227 : MW566812.1    228 : MW420061.1    229 : MW420568.1    230 : MW206309.1

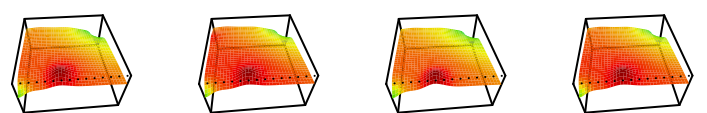

**B.1.243**

231 : MW782837.1    232 : MW653595.1    233 : MW635155.1    234 : MW565465.1    235 : MW420588.1    236 : MW276556.1    237 : MW036063.1

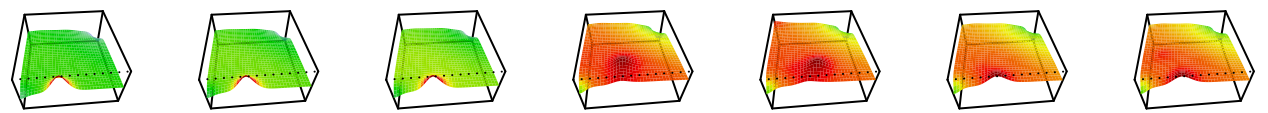

B.1.258.21

238 : MW453084.1

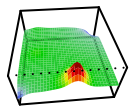

B.1.265

239 : MW708707.1

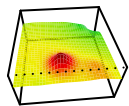

B.1.274

240 : MW206082.1

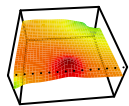

B.1.284

241 : MW064341.1

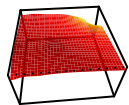

B.1.298

242 : MW709154.1

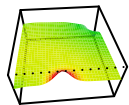

B.1.305

243 : MW815792.1

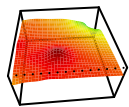

B.1.320

244 : MT641523.1

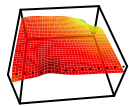

245 : MT628158.1

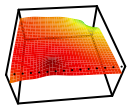

B.1.349

246 : MW668829.1

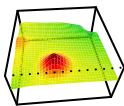

B.1.351\_VOC

247 : MW621453.1    248 : MW913437.1    249 : MW914008.1    250 : MW914015.1    251 : MW914542.1    252 : MW905844.1    253 : MW907199.1    254 : MW907323.1    255 : MW908243.1    256 : MW908815.1    257 : MW909222.1    258 : MW849825.1

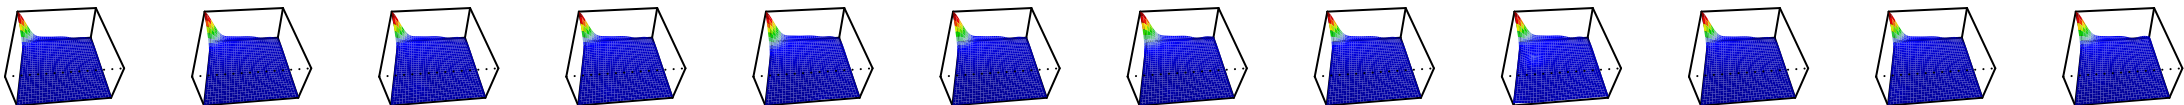

259 : MW795351.1    260 : MW796654.1    261 : MW792684.1    262 : MW792756.1    263 : MW793005.1    264 : MW773815.1

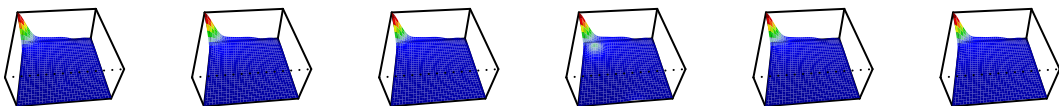

B.1.36.27

265 : MW691153.1

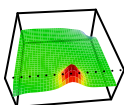

B.1.360

266 : MW064652.1

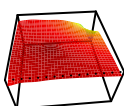

B.1.369

267 : MT843300.1    268 : MT827251.1

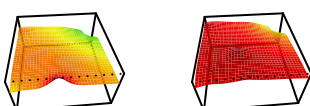

B.1.371

269 : MT994395.1    270 : MT642377.1

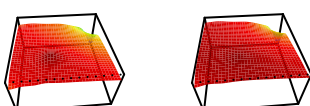



# B.1.382

271 : MW471399.1

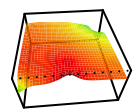

# B.1.384

272 : MW206155.1

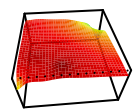

# B.1.400

273 : MW634571.1

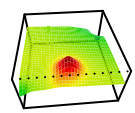

# B.1.427\_VOC

274 : MW902062.1    275 : MW903304.1    276 : MW904442.1    277 : MW891068.1    278 : MW869965.1    279 : MW850286.1    280 : MW796674.1    281 : MW792927.1    282 : MW777189.1    283 : MW766808.1    284 : MW737960.1    285 : MW739415.1

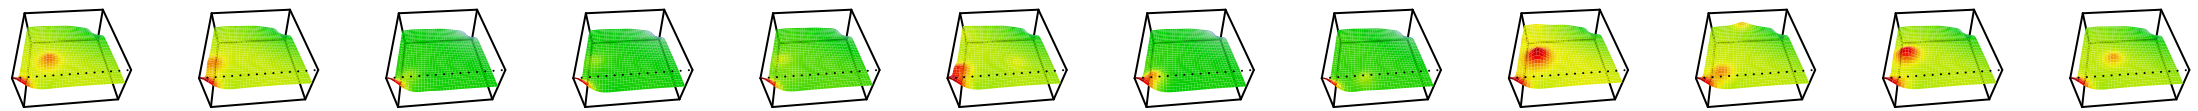

286 : MW730985.1    287 : MW731276.1    288 : MW731356.1    289 : MW731747.1    290 : MW638933.1    291 : MW564964.1

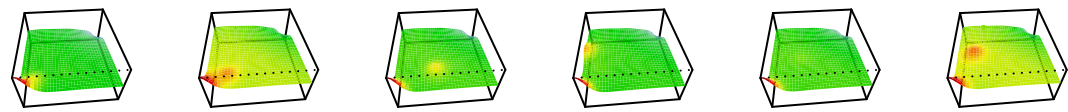

# B.1.429\_VOC

292 : MW903146.1    293 : MW890985.1    294 : MW891299.1    295 : MW850582.1    296 : MW855628.1    297 : MW855781.1    298 : MW848299.1    299 : MW849087.1    300 : MW850114.1    301 : MW837289.1    302 : MW837390.1    303 : MW821827.1

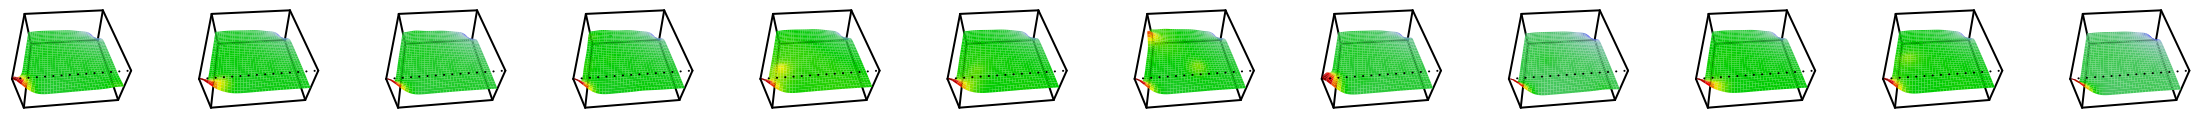

304 : MW796797.1    305 : MW796840.1    306 : MW788789.1    307 : MW792842.1    308 : MW792999.1    309 : MW793073.1    310 : MW780400.1    311 : MW781335.1    312 : MW767571.1    313 : MW763186.1    314 : MW766623.1    315 : MW766643.1

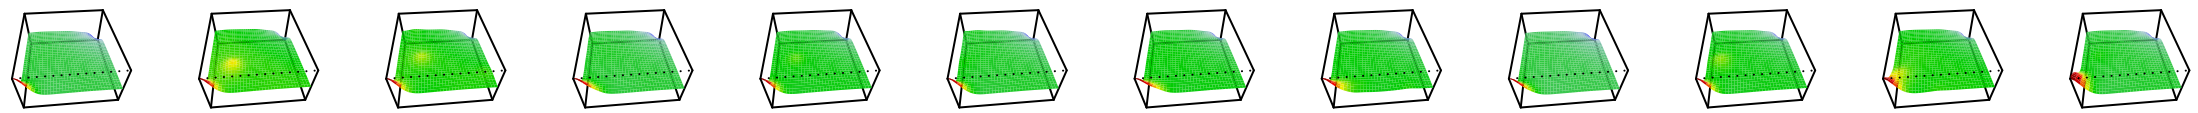

316 : MW766742.1      317 : MW739122.1      318 : MW731201.1      319 : MW731327.1      320 : MW731376.1      321 : MW731779.1      322 : MW734228.1      323 : MW734357.1      324 : MW708099.1      325 : MW708538.1      326 : MW701159.1      327 : MW701205.1

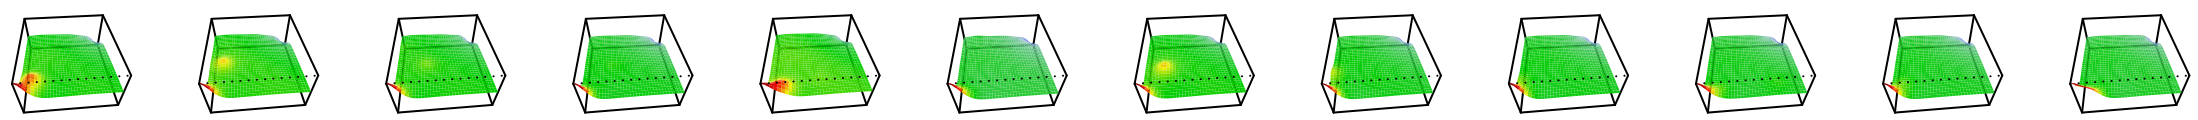

328 : MW702079.1      329 : MW702856.1      330 : MW703006.1      331 : MW692964.1      332 : MW545329.1      333 : MW460632.1

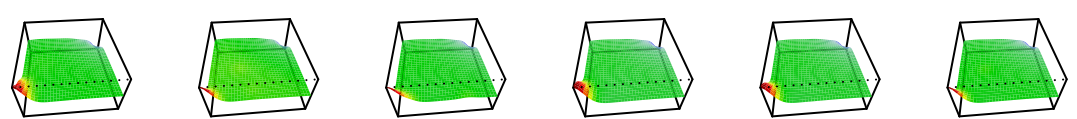

*B.1.436*

334 : MW279421.1

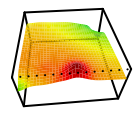

*B.1.444*

335 : MW420740.1

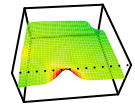

*B.1.446*

336 : MT358739.1

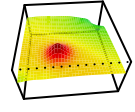

*B.1.492*

337 : MW645969.1

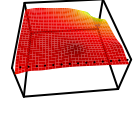

*B.1.517*

338 : MW782901.1      339 : MW783000.1      340 : MW715189.1      341 : MW550003.1

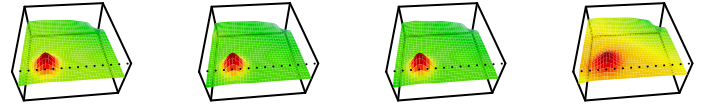



# B.1.525\_VOC

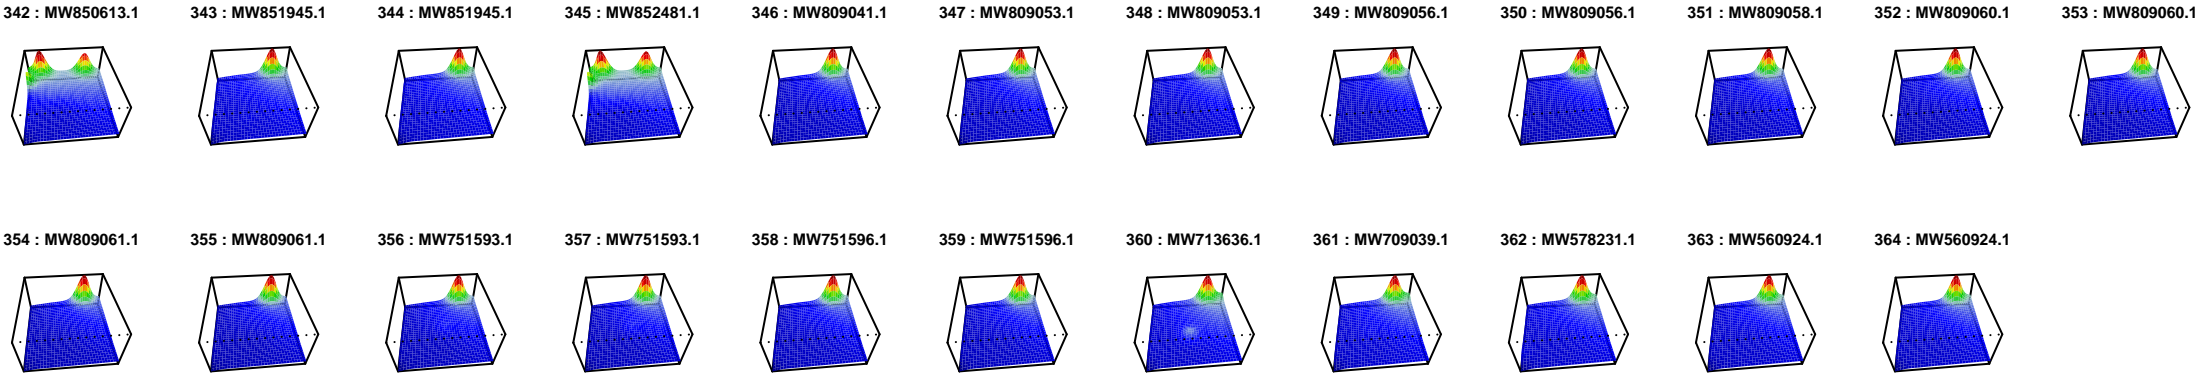

# B.1.526

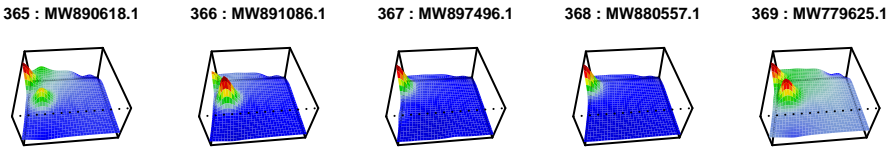

# B.1.526.2

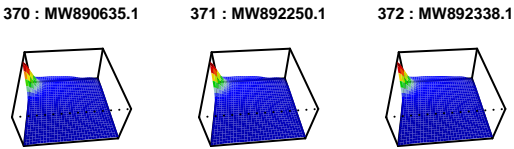

# B.1.544

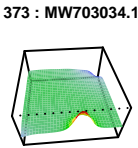

# B.1.565

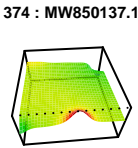

# B.1.568

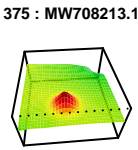

B.1.575

376 : MW902922.1

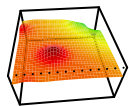

B.1.590

377 : MW191464.1

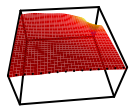

B.1.595

378 : MW735956.1

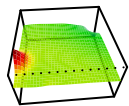

379 : MW728639.1

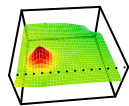

B.1.595.1

380 : MW286639.1

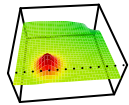

B.1.596

381 : MW904425.1

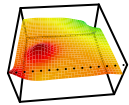

382 : MW891324.1

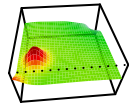

383 : MW820254.1

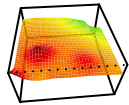

B.1.617.1\_VOC

384 : MW903294.1

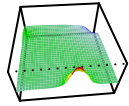

B.19

385 : MT438750.1

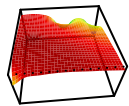

B.40

386 : MT507274.1

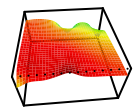

B.46

387 : MT534317.1

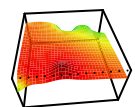

C.26

388 : MW365070.1

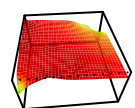

C.35

389 : MW454582.1

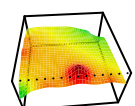

D.2

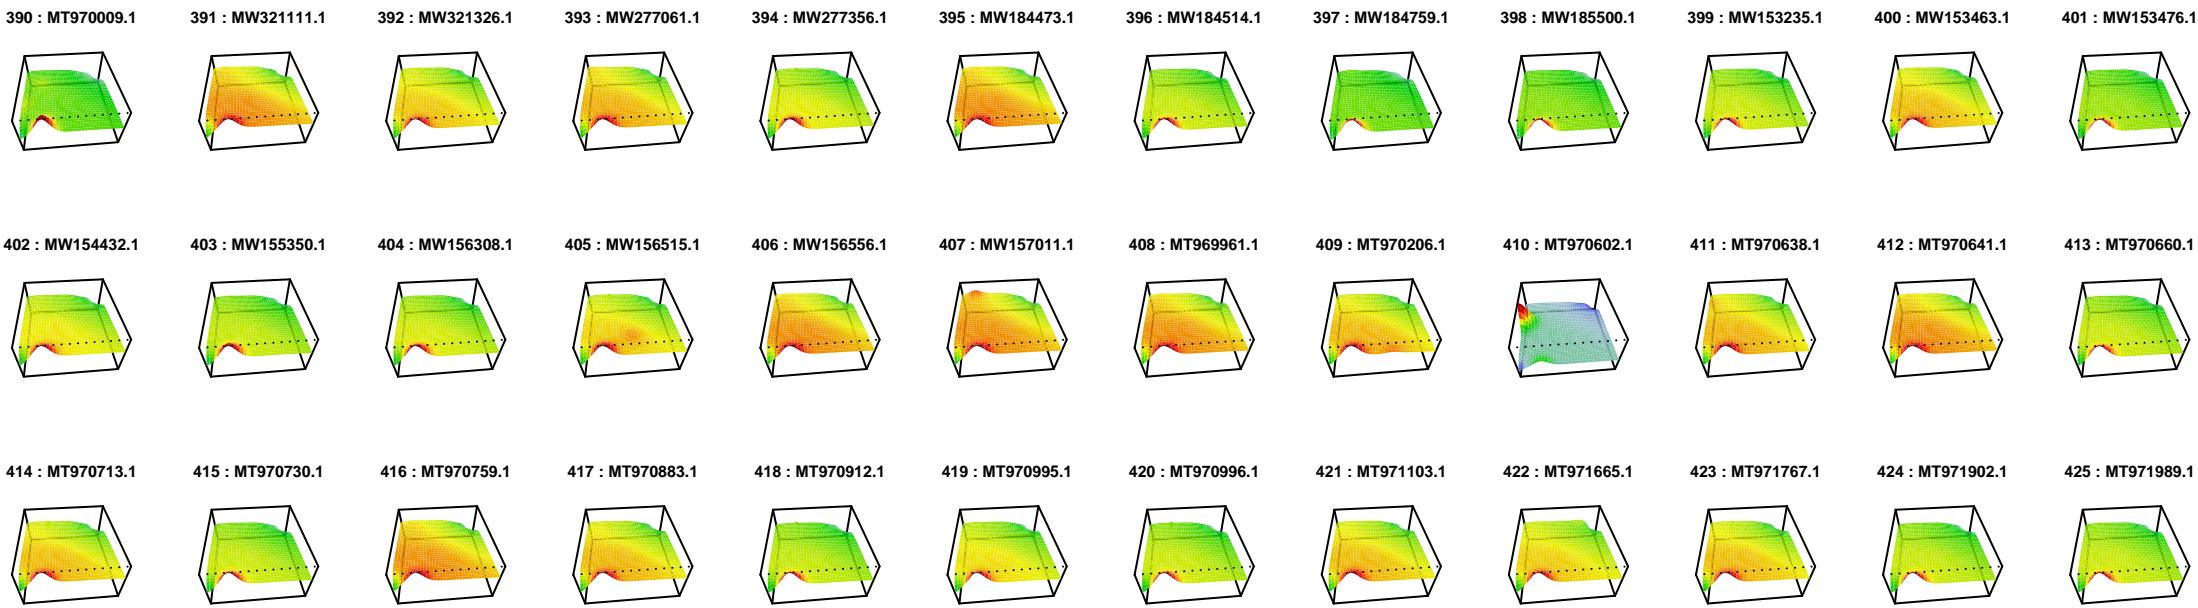

426 : MT972311.1      427 : MT972565.1      428 : MT972587.1      429 : MT973080.1      430 : MT973202.1      431 : MT973284.1

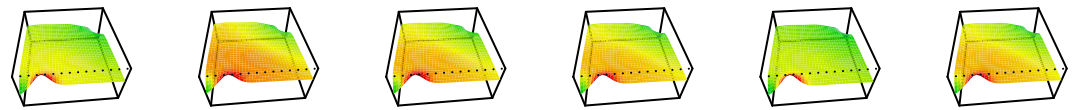

*P.1\_VOC*

432 : MW911880.1      433 : MW912245.1      434 : MW912407.1      435 : MW912428.1      436 : MW907170.1      437 : MW907250.1      438 : MW907917.1      439 : MW907928.1      440 : MW892126.1      441 : MW876960.1      442 : MW877029.1      443 : MW834962.1

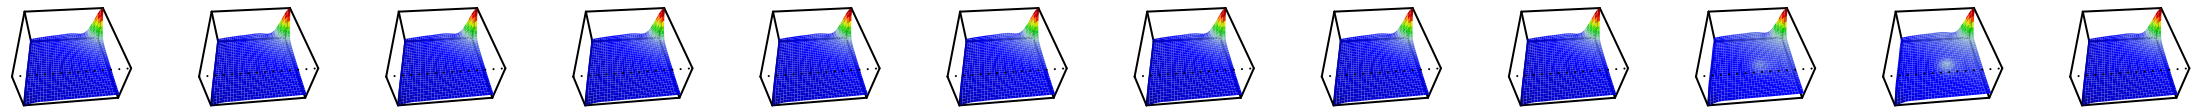

444 : MW834965.1      445 : MW834977.1      446 : MW834982.1      447 : MW837448.1      448 : MW808135.1      449 : MW912118.1      450 : MW912124.1      451 : MW912172.1      452 : MW912219.1      453 : MW912312.1      454 : MW912340.1      455 : MW912400.1

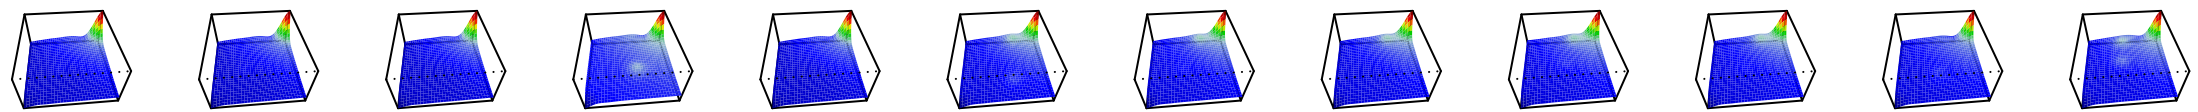

456 : MW912449.1      457 : MW912471.1      458 : MW912493.1      459 : MW913826.1      460 : MW914410.1      461 : MW914411.1      462 : MW914415.1      463 : MW915187.1      464 : MW915209.1      465 : MW915283.1      466 : MW908127.1      467 : MW908289.1

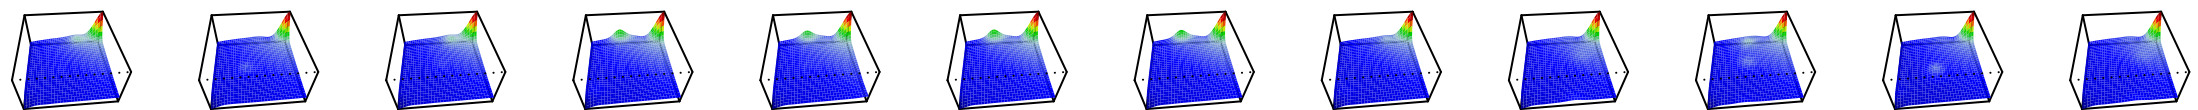

468 : MW908507.1      469 : MW908736.1      470 : MW909170.1      471 : MW892330.1      472 : MW892702.1      473 : MW894068.1      474 : MW872690.1      475 : MW850614.1      476 : MW850627.1      477 : MW834807.1      478 : MW834974.1      479 : MW834975.1

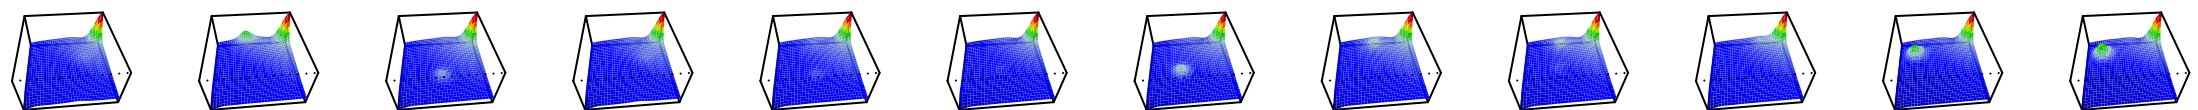

480 : MW807979.1      481 : MW520923.1

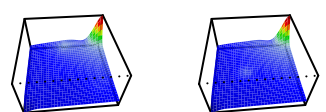

*W.1*

482 : MW851843.1

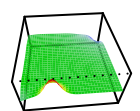

B.1.351\_VOC x

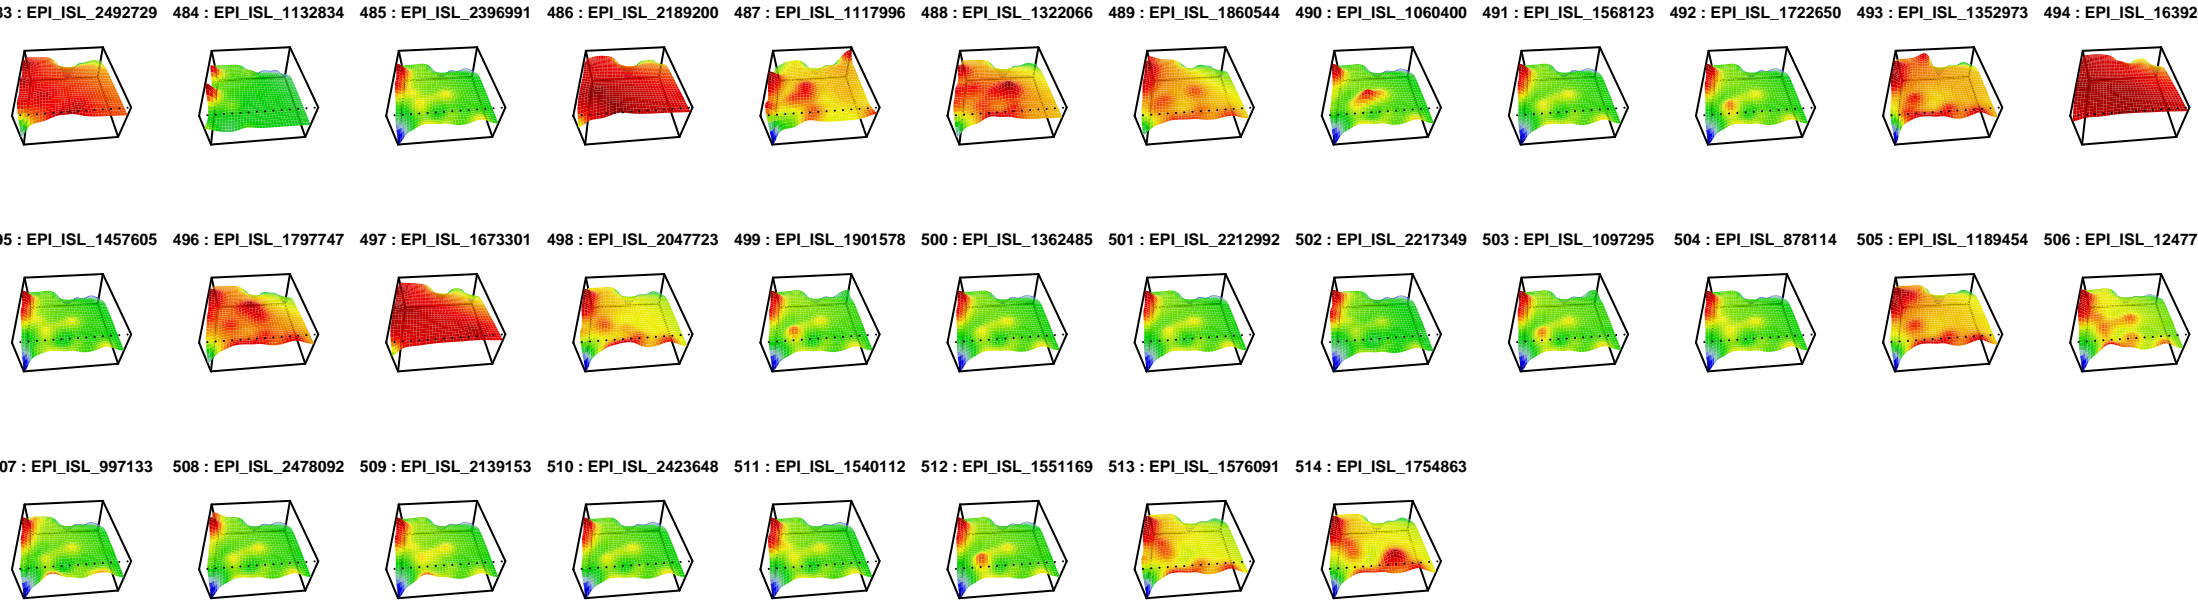

B.1.525\_VOC x

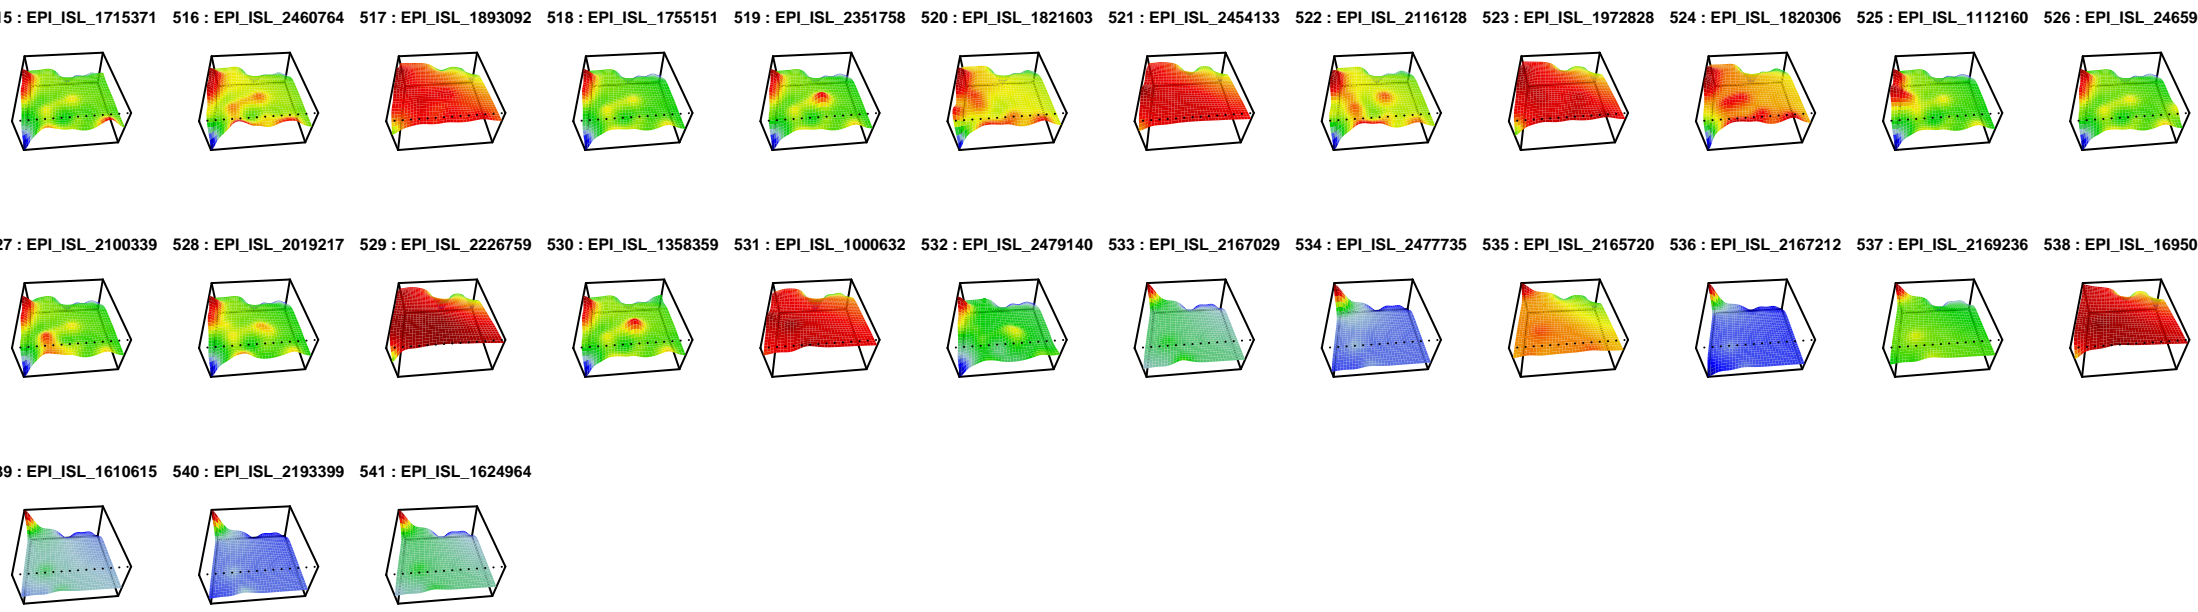

B.1.617.1\_VOC x

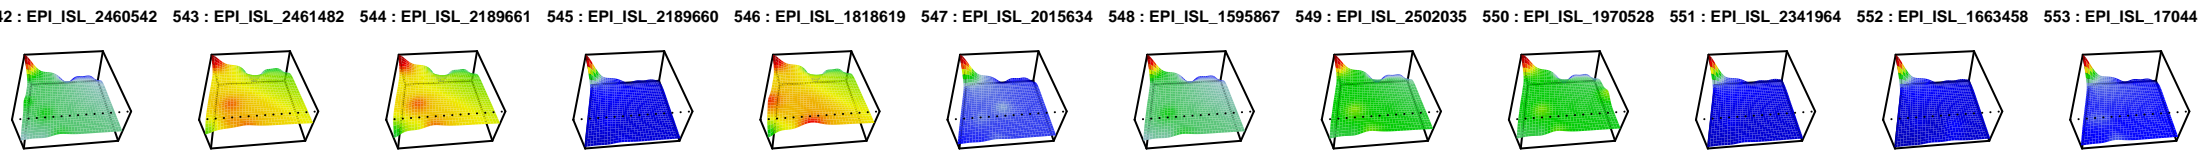



554 : EPI\_ISL\_1544013   555 : EPI\_ISL\_2341688   556 : EPI\_ISL\_1415308   557 : EPI\_ISL\_2342920   558 : EPI\_ISL\_2332712   559 : EPI\_ISL\_2225634   560 : EPI\_ISL\_1544032   561 : EPI\_ISL\_2441382   562 : EPI\_ISL\_2441449   563 : EPI\_ISL\_1841364   564 : EPI\_ISL\_2462034   565 : EPI\_ISL\_2461766

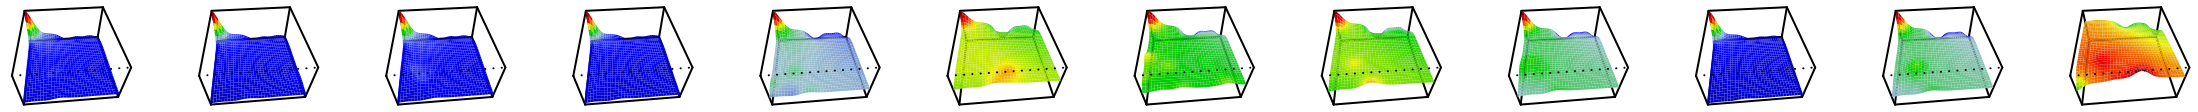

566 : EPI\_ISL\_2461540   567 : EPI\_ISL\_2400210   568 : EPI\_ISL\_2503645   569 : EPI\_ISL\_2503621   570 : EPI\_ISL\_2503718   571 : EPI\_ISL\_2503413   572 : EPI\_ISL\_1589934   573 : EPI\_ISL\_2503469   574 : EPI\_ISL\_2503472   575 : EPI\_ISL\_2425328   576 : EPI\_ISL\_2425119   577 : EPI\_ISL\_1745201

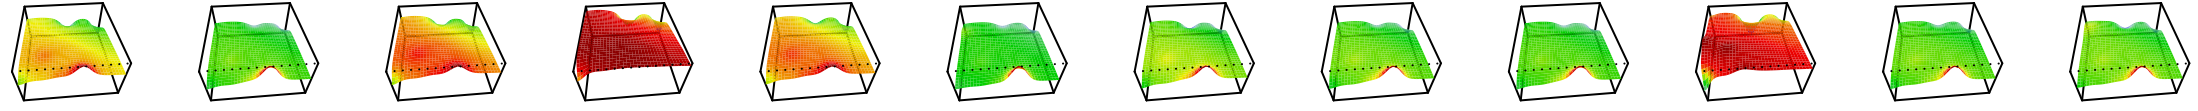

578 : EPI\_ISL\_2032644   579 : EPI\_ISL\_1790913   580 : EPI\_ISL\_1830312   581 : EPI\_ISL\_1829381   582 : EPI\_ISL\_1632073   583 : EPI\_ISL\_2004530   584 : EPI\_ISL\_1519930   585 : EPI\_ISL\_1637489   586 : EPI\_ISL\_2167855   587 : EPI\_ISL\_2479663   588 : EPI\_ISL\_1675223   589 : EPI\_ISL\_1483794

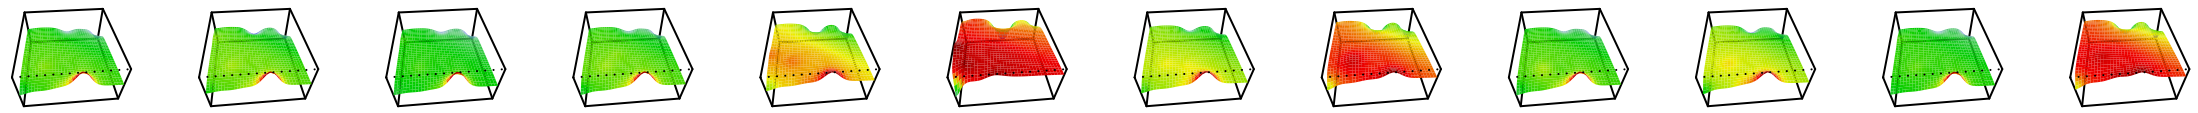

590 : EPI\_ISL\_1680407

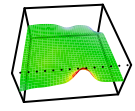

## B.1.617.2\_VOC x

591 : EPI\_ISL\_2373233   592 : EPI\_ISL\_2441211   593 : EPI\_ISL\_2342881   594 : EPI\_ISL\_1928601   595 : EPI\_ISL\_2342303   596 : EPI\_ISL\_2272862   597 : EPI\_ISL\_2433605   598 : EPI\_ISL\_2433607   599 : EPI\_ISL\_1847907   600 : EPI\_ISL\_2466790   601 : EPI\_ISL\_2425699   602 : EPI\_ISL\_2362103

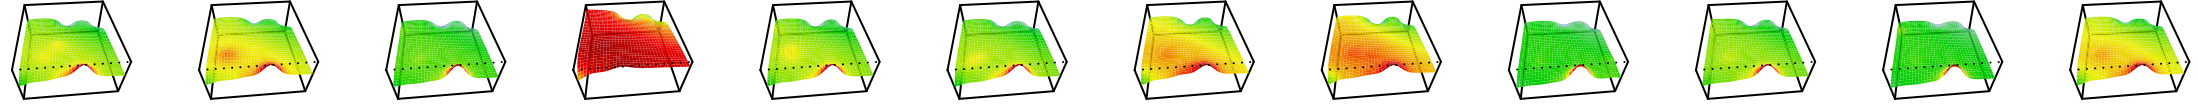

603 : EPI\_ISL\_1833679   604 : EPI\_ISL\_2456597   605 : EPI\_ISL\_2022336   606 : EPI\_ISL\_2486655   607 : EPI\_ISL\_2236320   608 : EPI\_ISL\_2392846   609 : EPI\_ISL\_2436865   610 : EPI\_ISL\_2393918   611 : EPI\_ISL\_2366559   612 : EPI\_ISL\_2127621   613 : EPI\_ISL\_2253453   614 : EPI\_ISL\_2275187

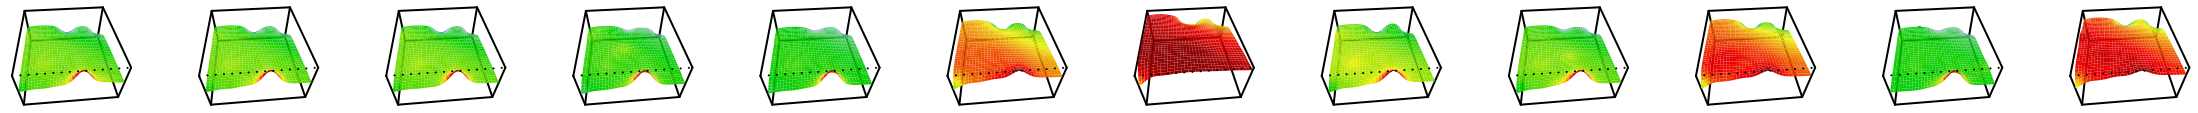

615 : EPI\_ISL\_1652717   616 : EPI\_ISL\_2318458   617 : EPI\_ISL\_2318096   618 : EPI\_ISL\_1719099   619 : EPI\_ISL\_2118684   620 : EPI\_ISL\_2119601   621 : EPI\_ISL\_2395335   622 : EPI\_ISL\_2394556   623 : EPI\_ISL\_2437112   624 : EPI\_ISL\_2348188   625 : EPI\_ISL\_2317202   626 : EPI\_ISL\_2395662

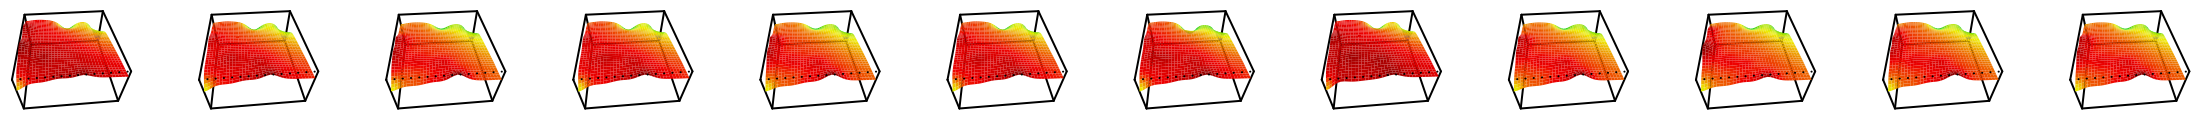

627 : EPI\_ISL\_2436354 628 : EPI\_ISL\_2199493 629 : EPI\_ISL\_2366576 630 : EPI\_ISL\_2346787 631 : EPI\_ISL\_2394563 632 : EPI\_ISL\_1637187 633 : EPI\_ISL\_2435737 634 : EPI\_ISL\_2457646 635 : EPI\_ISL\_2354411 636 : EPI\_ISL\_2408029 637 : EPI\_ISL\_2408027 638 : EPI\_ISL\_2488228

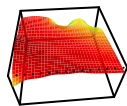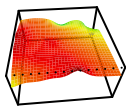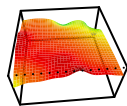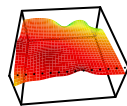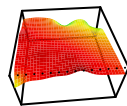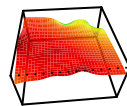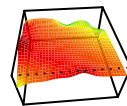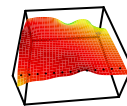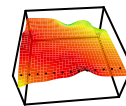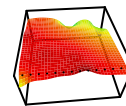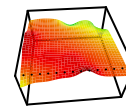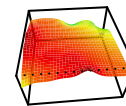

639 : EPI\_ISL\_2453182 640 : EPI\_ISL\_2311908

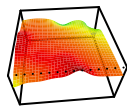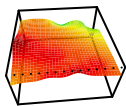

C.37\_VOC x

641 : EPI\_ISL\_2183611 642 : EPI\_ISL\_1439856 643 : EPI\_ISL\_2471722 644 : EPI\_ISL\_2389648 645 : EPI\_ISL\_2472531 646 : EPI\_ISL\_2115343 647 : EPI\_ISL\_2402495 648 : EPI\_ISL\_2283637 649 : EPI\_ISL\_1910812 650 : EPI\_ISL\_2269500 651 : EPI\_ISL\_2371967 652 : EPI\_ISL\_1924317

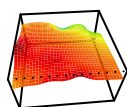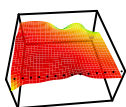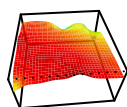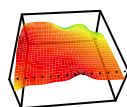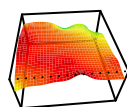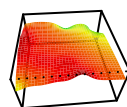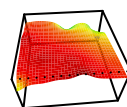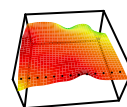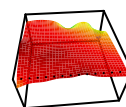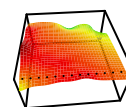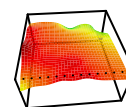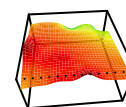

653 : EPI\_ISL\_2184982 654 : EPI\_ISL\_2277931 655 : EPI\_ISL\_1460222 656 : EPI\_ISL\_2148134 657 : EPI\_ISL\_2246563 658 : EPI\_ISL\_2244899 659 : EPI\_ISL\_1560226 660 : EPI\_ISL\_2161738 661 : EPI\_ISL\_1258712 662 : EPI\_ISL\_1306752 663 : EPI\_ISL\_1160917 664 : EPI\_ISL\_2185424

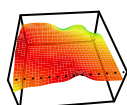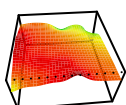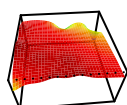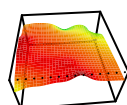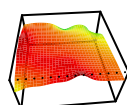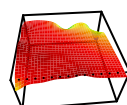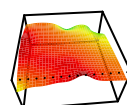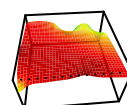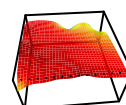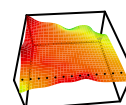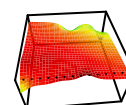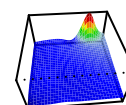

665 : EPI\_ISL\_1526920 666 : EPI\_ISL\_2158760 667 : EPI\_ISL\_2135985 668 : EPI\_ISL\_2009562 669 : EPI\_ISL\_2009634 670 : EPI\_ISL\_2391218 671 : EPI\_ISL\_2391351 672 : EPI\_ISL\_1321474 673 : EPI\_ISL\_2009241 674 : EPI\_ISL\_2391305 675 : EPI\_ISL\_2009644 676 : EPI\_ISL\_2009269

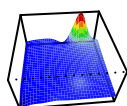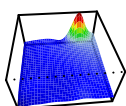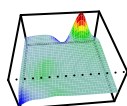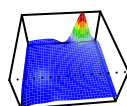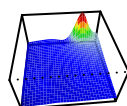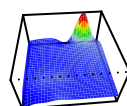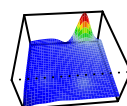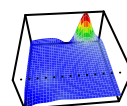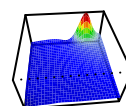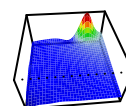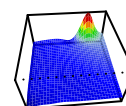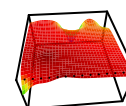

677 : EPI\_ISL\_2467237 678 : EPI\_ISL\_2467154 679 : EPI\_ISL\_2467138 680 : EPI\_ISL\_2009580 681 : EPI\_ISL\_1633506 682 : EPI\_ISL\_2391424 683 : EPI\_ISL\_2391404 684 : EPI\_ISL\_1633495 685 : EPI\_ISL\_2391389 686 : EPI\_ISL\_2009302 687 : EPI\_ISL\_2391382 688 : EPI\_ISL\_1633528

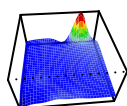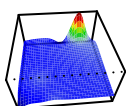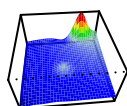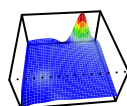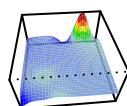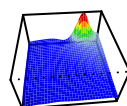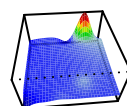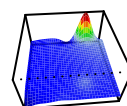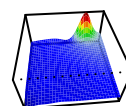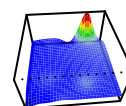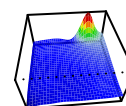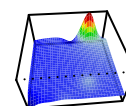

689 : EPI\_ISL\_2488721 690 : EPI\_ISL\_2427682

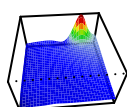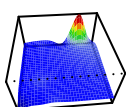

# P.3\_VOC x

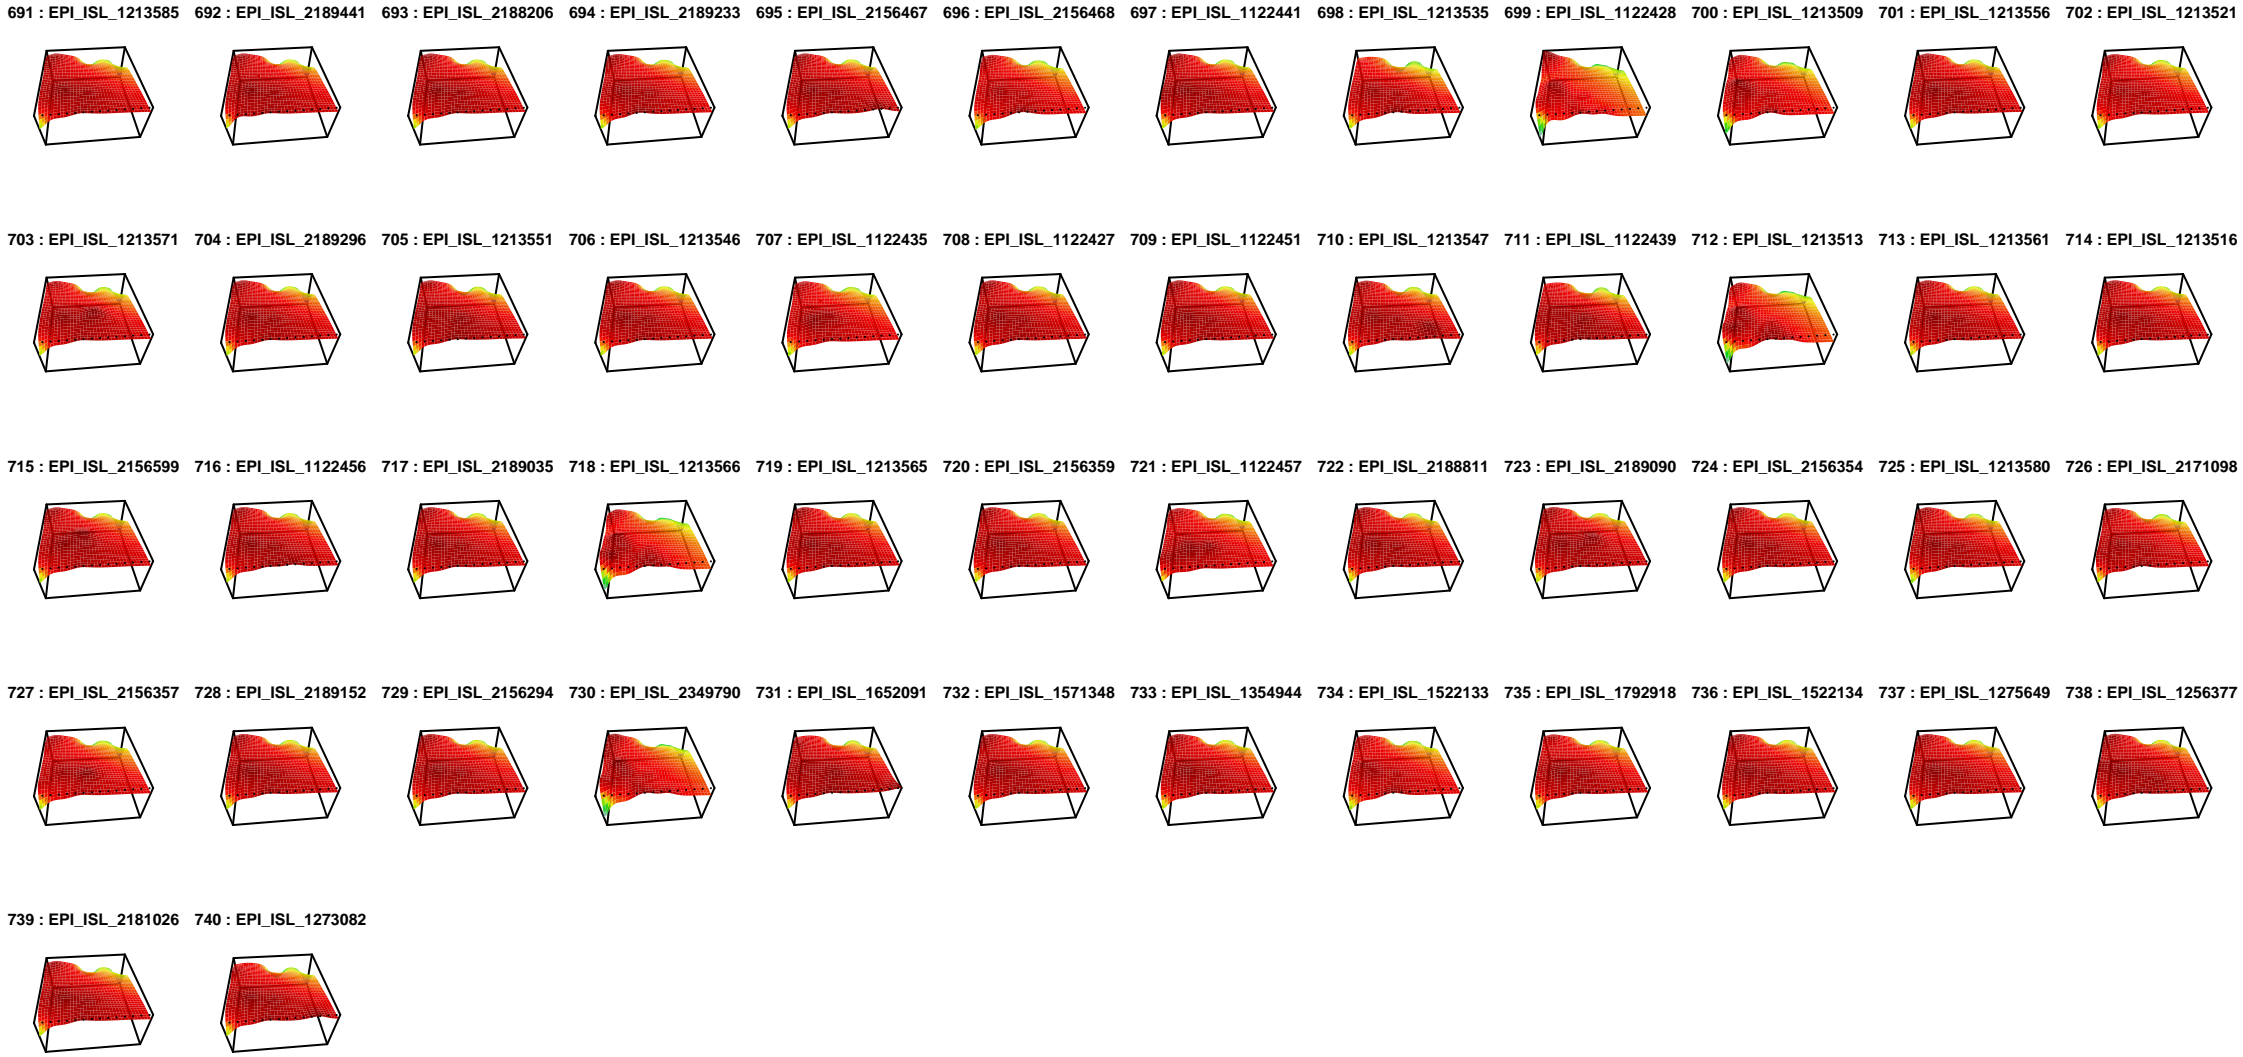

Supplement: s1 [file s1]
